# Supplementary material
Source: Royal Society of Chemistry journal article supplement (doi:10.1039/d6cp00754f)
Supplement: d6cp00754f1.pdf [file d6cp00754f1.pdf]

Supporting Information for:

## **Carboxyl-functionalized flavin as efficient heavy-atom-free triplet photosensitizers: A theoretical investigation**

Huimin Guo<sup>1,\*</sup>, Heping Li<sup>1</sup>, Chengyu Yang<sup>1</sup>

<sup>1</sup>School of Chemistry, State Key Laboratory of Fine Chemicals, Dalian University of  
Technology, Dalian, 116024, P. R. China.

\*Corresponding author, email: guohm@dlut.edu.cn (H.G.)

This file contains 19 Tables and 19 Figures in 43 pages.

**Keywords:**

Flavin; Triplet Excited State Lifetime; Photosensitizer; Electron Transfer; Carboxylate

## THEORETICAL METHODS

### Evaluation of electronic structure at ground state and excited states

DFT and TD-DFT based calculations were performed to investigate electronic structure of methyl flavin carboxylate (McFL, Fig. 1a). Methyl was used to represent the alkyl moieties. The compounds of interest were fully relaxed at B3LYP/6-311G(d) level to get the ground state ( $S_0$ ) structures.<sup>1-4</sup> Polarizable Continuum Model (PCM) was used to handle the impact of acetyl nitrile ( $CH_3CN$ ) solvent unless specified.<sup>5-7</sup> The excited structures of FL, McFLs were fully relaxed without any constrain with TD-DFT based calculations at the same level of theory with Gaussian 16.<sup>8</sup> Frequency calculations were performed for all reported structures to insure their nature of minima on the corresponding potential energy surface (PES). The transition dipole moments from  $T_n$  to  $S_0$  are evaluated from the quadratic response function<sup>9-11</sup> and the spin-orbit coupling matrix elements are computed at the same level of theory using the effective single-electron approximation in linear response theory with the Dalton program.<sup>12-14</sup> Photophysical properties of these compounds were investigated with Thermal Vibration Correlation Function (TVCF) formalism proposed by Shuai, Peng and coworkers as implemented in MOMAP and integrated with Device Studio.<sup>15-20</sup>

### Calculation of photophysical properties of McFLs

The absorption, fluorescence and phosphorescence spectra of compounds, together with the radiative and non-radiative decay rate constants were calculated using MOMAP.<sup>15-19, 21</sup> The absorption and fluorescence spectra were calculated according to eq-S1 and 2:

$$\sigma(\omega)_{abs} = \frac{4\pi^2\omega}{3\hbar c} \times \sum_{v_i, v_f} P_{iv_i}(T) \left| \langle \Theta_{f, v_f} | \mu_{fi} | \Theta_{i, v_i} \rangle \right|^2 \delta(\omega - \omega_{f, v_f, i, v_i}) \quad (\text{eq-S1})$$

$$\sigma(\omega)_{emi} = \frac{4\omega^3}{3\hbar c} \times \sum_{v_i, v_f} P_{iv_i}(T) \left| \langle \Theta_{f, v_f} | \mu_{fi} | \Theta_{i, v_i} \rangle \right|^2 \delta(\omega_{i, v_i, f, v_f} - \omega) \quad (\text{eq-S2})$$

where  $P_{iv_i}(T)$  is the Boltzmann population of the vibrational manifolds in the initial state,  $\mu_{fi} = \langle \Phi_f | \mu | \Phi_i \rangle$  is the electronic transition dipole moment between the initial state  $i$  and final state  $f$  calculated according to the Frank-Condon approximation,  $v_i/v_f$  is vibrational quantum number of state  $i/f$ ,  $\Theta_{f, v_f}$  is the  $v_f$ th vibrational state of final state  $f$ ,  $\omega$  is the radiation frequency and  $\omega_{i, v_i, f, v_f} = \omega_{f, v_f} - \omega_{i, v_i}$ , respectively. The absorption and emission rate constants were calculated as the integration of the spectra.<sup>21-24</sup>

For the non-radiative decay, applying the second-order perturbation approximation, the rate constants were calculated as:

$$k_{f \leftarrow i} = \frac{2\pi}{\hbar} \sum_{v_i, v_f} P_{iv_i} \left| H'_{fv_f, iv_i} + \sum_{n, v_n} \frac{H'_{fv_f, nv_n} H'_{nv_n, iv_i}}{E_{iv_i} - E_{nv_n}} \right|^2 \times \delta(E_{iv_i} - E_{fv_f}) \quad (\text{eq-S3})$$

where,  $v_i/v_f$  is vibrational quantum number of state  $i/f$  and  $H'$  is the interaction between 2 different Born-Oppenheimer states and calculated as  $H'\psi_{iv_i} = H^{NA}\Phi_i(r:Q)\Theta_{iv_i}(Q) + H^{SO}\Phi_i(r:Q)\Theta_{iv_i}(Q)$ , where  $H^{NA}$  is the non-adiabatic coupling operator,  $H^{SO}$  is the spin-orbital coupling operator,  $r$  and  $Q$  are the electronic and nuclear normal mode coordinates.<sup>25</sup>

By applying a displaced oscillator mode and short time approximation, the internal conversion rate constant can be derived as:

$$\log k_{ic,l}(\omega_{if}) \propto -(-\omega_{if} + \omega_i + \sum_{j(j \neq l)} S_j \omega_j)^2 / 2 \sum_{j(j \neq l)} S_j \omega_j^2 (2n_j + 1) \quad (\text{eq-S3}')$$

where  $S_j = \omega_j D_j^2 / 2\hbar$  is the Huang-Rhys factor and  $D_j$  is the displacement of  $j$ th mode,  $n_j$  is the phonon distribution function and  $\lambda_j = S_j \hbar \omega_j$  is the reorganization of  $j$ th accepting mode.

By applying short-time approximation under the framework of the displaced harmonic oscillator model, the non-radiative decay rate constant for  $T_1 \rightarrow S_0$  can be calculated as:

$$k'_{ISC} = \exp \left[ -\frac{(\Delta E_{ad} - \sum_k \lambda_k)^2}{4 \sum_k \lambda_k E_k} + \ln \left( \frac{1}{\hbar} |\langle S_0 | H^{SO} | T_1 \rangle|^2 \sqrt{\frac{\pi}{\sum_k \lambda_k E_k}} \right) \right] \quad (\text{eq-S3}'')$$

where  $\Delta E_{ad}$  is the adiabatic excitation energy;  $\lambda_k = S_k \hbar \omega_k = \omega_k^2 D_k^2 / 2$  is the reorganization energy for the  $k$ th mode;  $S_k$  and  $D_k$  are the Huang-Rhys factor and displacement of the mode with frequency of  $\omega_k$ , respectively;  $E_k$  is the average vibration energy.

The transition dipole moment for phosphorescence was calculated as eq-S4:

$$\mu_{ST_\kappa} = \sum_k^{\{singlets\}} \frac{\langle S | \mu | {}^1k \rangle \langle {}^1k | H^{SO} | T_\kappa \rangle}{{}^3E_T^0 - {}^1E_k^0} + \sum_n^{\{triplets\}} \sum_{\kappa'=1}^3 \frac{\langle S | H^{SO} | {}^3n_{\kappa'} \rangle \langle {}^3n_{\kappa'} | \mu | T_\kappa \rangle}{{}^1E_S^0 - {}^3E_n^0} \quad (\text{eq-S4})$$

where  $\kappa$  is the magnetic quantum number,  $n$  and  $k$  are the intermediate triplet and singlet electronic states, respectively. Applying the Franck-Condon approximation, the phosphorescence spectra were calculated as eq-S5<sup>19</sup>:

$$\sigma_{ph}(\omega, T) = \frac{4\omega^3}{3\hbar c^3} \times \sum_{v_i, v_f} P_{iv_i}(T) \left| \langle \Theta_{f, v_f} | \mu_{ST} | \Theta_{i, v_i} \rangle \right|^2 \delta(\omega_{i, v_i, f, v_f} - \omega) \quad (\text{eq-S5})$$

The radiative decay rate constant was calculated as the integration of the phosphorescence spectra.

The intersystem crossing rate constant can be calculated as:

$$k_{ISC} = k_{ISC}^{(0)} + k_{ISC}^{(1)} + k_{ISC}^{(2)} \quad (\text{eq-S6})$$

where:

$$k_{ISC}^{(0)} = \frac{2\pi}{\hbar} \sum_{v_i, v_f} P_{iv_i} \left| H'_{fv_f, iv_i} \right|^2 \times \delta(E_{iv_i} - E_{fv_f}) \quad (\text{eq-S7})$$

$$k_{ISC}^{(1)} = \frac{2\pi}{\hbar} \sum_{v_i, v_f} P_{iv_i} 2\text{Re} \left( H'_{fv_f, iv_i} \sum_{n, v_n} \frac{H'_{fv_f, nv_n} H'_{nv_n, iv_i}}{E_{iv_i} - E_{nv_n}} \right) \times \delta(E_{iv_i} - E_{fv_f}) \quad (\text{eq-S8})$$

$$k_{ISC}^{(2)} = \frac{2\pi}{\hbar} \sum_{v_i, v_f} P_{iv_i} \left| \sum_{n, v_n} \frac{H'_{fv_f, nv_n} H'_{nv_n, iv_i}}{E_{iv_i} - E_{nv_n}} \right|^2 \times \delta(E_{iv_i} - E_{fv_f}) \quad (\text{eq-S9})$$

where  $H'$  is the interaction between 2 different Born-Oppenheimer states and calculated as  $H'\psi_{iv_i} = H^{NA}\Phi_i(r:Q)\Theta_{iv_i}(Q) + H^{SO}\Phi_i(r:Q)\Theta_{iv_i}(Q)$ , where  $H^{NA}$  is the non-adiabatic coupling operator,  $H^{SO}$  is the spin-orbital coupling operator. The intersystem crossing rate constant can be calculated using the above methods by switching the initial and final states. More details on calculation of these spectra and rate constants can be found in Ref. 15-24.

The triplet quantum yield ( $\Phi_T$ ) of these McFLs were calculated as:

$$\Phi_T = \sum k_{ISC, S_1 \rightarrow T_n} / (k_{f, S_1 \rightarrow S_0} + k_{IC, S_1 \rightarrow S_0} + \sum k_{ISC, S_1 \rightarrow T_n}) \quad (\text{eq-S10})$$

In eq-S1,  $k_{f, S_1 \rightarrow S_0}$ ,  $k_{IC, S_1 \rightarrow S_0}$ , and  $\sum k_{ISC, S_1 \rightarrow T_n}$  are the rate constants for FE, IC, and the sum of ISC from  $S_1$  to energy allowed triplet excited states, respectively.

### The Kinetic Model

Based on the calculated photophysical properties and rate constants, the photophysical processes involved for evolution of FL and McFLs under continuous irradiation can be derived. They start with the population of FL and McFLs to spin allowed  $S_1$ . Then, the excited FL and McFLs would evolve via IC and FE from  $S_1$ . In absence of ICT for FL and McFLs, energy downhill ISC  $S_1 \rightarrow T_n$  processes may also take place competing with IC and FE. After reaching  $T_n$ , excited FL and McFLs would decay into spin allowed  $T_1$  very fast. Finally, these excited FL and McFLs at  $T_1$  would decay via PE or nonradiative decay back to  $S_0$ .

The equations describing concentration of McFLs at  $S_0$ ,  $S_1$ ,  $T_1$ ,  $T_2$  and  $T_3$  as functions of time can be written as the following:

$$\frac{dc_{S_0}}{dt} = -k_{ad}c_{S_0} + c_{S_1}(k_f + k_{IC}) + \sum_1^3 c_{T_n} [k_p(T_n-S_0) + k_{ISC}(T_n-S_0)] \quad (\text{eq-S11})$$

$$\frac{dc_{S_1}}{dt} = k_{ad}c_{S_0} - c_{S_1}(k_f + k_{IC} + \sum_1^3 c_{T_n} k_{ISC}(S_1-T_n)) + \sum_1^3 c_{T_n} k_{RISC}(T_n-S_1) \quad (\text{eq-S12})$$

$$\frac{dc_{T_1}}{dt} = k_{ISC}(S_1-T_1)c_{S_1} - c_{T_1}(k_p(T_1-S_0) + k_{ISC}(T_1-S_0) + k_{RISC}(T_1-S_1)) + k_{IC}(T_3-T_1)c_{T_3} + k_{IC}(T_2-T_1)c_{T_2} \quad (\text{eq-S13})$$

$$\frac{dc_{T_2}}{dt} = k_{ISC}(S_1-T_2)c_{S_1} + k_{IC}(T_3-T_2)c_{T_3} - c_{T_2}(k_p(T_2-S_0) + k_{ISC}(T_2-S_0) + k_{IC}(T_2-T_1) + k_{RISC}(T_2-S_1)) \quad (\text{eq-S14})$$

$$\frac{dc_{T_3}}{dt} = k_{ISC}(S_1-T_3)c_{S_1} - c_{T_3}(k_p(T_3-S_0) + k_{ISC}(T_3-S_0) + k_{IC}(T_3-T_1) + k_{IC}(T_3-T_2) + k_{RISC}(T_3-S_1)) \quad (\text{eq-S15})$$

Furthermore,

$$k_{ad} = \sigma F \quad (\text{eq-S16})$$

$$F = \frac{P}{Ah\nu} = 6.79 \times 10^{19} \text{Photons} \cdot \text{cm}^{-2} \cdot \text{s}^{-1} \quad (\text{eq-S17})$$

$$10^{-\varepsilon cd} = e^{-\sigma nd} \quad (\text{eq-S18})$$

$$\sigma = \varepsilon \ln 10 \frac{c}{n} = \varepsilon \alpha = \alpha \varepsilon \quad (\text{eq-S19})$$

$$\alpha = 3.82 \times 10^{-21} \text{mol} \cdot \text{cm}^3 \cdot \text{L}^{-1} \quad (\text{eq-S20})$$

where  $\sigma$  is the absorption cross-section of sensitizer,  $P$  is the input power of light radiation at 455 nm, that is 30 W,  $\varepsilon$  is the molecular extinction constant ( $\text{dm}^3\text{mol}^{-1}\text{cm}^{-1}$ ),  $c$  is the concentration, in  $\text{mol L}^{-1}$ ,  $n$  is the particle density, in  $\text{cm}^{-3}$ ,  $d$  is path depth, in cm,  $\alpha$  is the conversion constant,  $\nu$  is the frequency,  $A$  is the cross-section of light, that is  $1 \text{ cm}^2$ .

By solving equations eq-S11 to eq-S15 iteratively, with eq-S16 to eq-S20, calculated photophysical properties in Tables 1, 2 and 3, and assuming McFLs are dissolved in acetyl nitrile solution of  $0.033 \text{ mol/L}$  at  $298 \text{ K}$  under continuous irradiation at wavelength of  $455 \text{ nm}$ , the steady state concentration of McFLs at  $S_0$ ,  $S_1$ ,  $T_1$ ,  $T_2$  and  $T_3$  can be obtained (Table 5).

**Table S1a.** Electronic transitions involved in the excitation of FL.

|                                 | Energy         | f      | Composition | Percentage <sup>a</sup> | Character |
|---------------------------------|----------------|--------|-------------|-------------------------|-----------|
| S <sub>0</sub> →S <sub>1</sub>  | 3.02 eV/410 nm | 0.2013 | 59→60       | 96.54%                  | π→π*      |
| S <sub>0</sub> →S <sub>2</sub>  | 3.35 eV/370 nm | 0.0008 | 56→60       | 54.94%                  | n→π*      |
|                                 |                |        | 57→60       | 42.74%                  | n→π*      |
| S <sub>0</sub> →S <sub>3</sub>  | 3.50 eV/354 nm | 0.0000 | 57→60       | 52.69%                  | n→π*      |
|                                 |                |        | 56→60       | 42.47%                  | n→π*      |
| S <sub>0</sub> →S <sub>4</sub>  | 3.75 eV/331 nm | 0.1821 | 58→60       | 92.42%                  | π→π*      |
| S <sub>0</sub> →S <sub>5</sub>  | 4.18 eV/297 nm | 0.0000 | 54→60       | 92.61%                  | n→π*      |
| S <sub>0</sub> →S <sub>6</sub>  | 4.24 eV/292 nm | 0.0111 | 55→60       | 92.35%                  | π→π*      |
| S <sub>0</sub> →S <sub>7</sub>  | 4.69 eV/265 nm | 0.0004 | 52→60       | 93.57%                  | n→π*      |
| S <sub>0</sub> →S <sub>8</sub>  | 4.82 eV/257 nm | 0.0158 | 53→60       | 85.50%                  | π→π*      |
|                                 |                |        | 58→61       | 11.10%                  | π→π*      |
| S <sub>0</sub> →S <sub>9</sub>  | 4.90 eV/259 nm | 0.7373 | 59→61       | 87.04%                  | π→π*      |
| S <sub>0</sub> →S <sub>10</sub> | 5.23 eV/237 nm | 0.0503 | 56→61       | 62.55%                  | n→π*      |
|                                 |                |        | 57→61       | 30.47%                  | n→π*      |
| S <sub>0</sub> →T <sub>1</sub>  | 2.15 eV/576 nm | 0.0000 | 59→60       | 96.79%                  | π→π*      |
| S <sub>0</sub> →T <sub>2</sub>  | 2.73 eV/454 nm | 0.0000 | 58→60       | 86.92%                  | π→π*      |
| S <sub>0</sub> →T <sub>3</sub>  | 2.90 eV/428 nm | 0.0000 | 56→60       | 69.71%                  | n→π*      |
|                                 |                |        | 57→60       | 18.76%                  | n→π*      |
|                                 |                |        | 52→60       | 8.25%                   | n→π*      |
| S <sub>0</sub> →T <sub>4</sub>  | 3.28 eV/378 nm | 0.0000 | 57→60       | 71.39%                  | n→π*      |
|                                 |                |        | 56→60       | 17.20%                  | n→π*      |
| S <sub>0</sub> →T <sub>5</sub>  | 3.61 eV/343 nm | 0.0000 | 55→60       | 67.59%                  | π→π*      |
|                                 |                |        | 59→61       | 21.90%                  | π→π*      |

<sup>a</sup> Orbital transition contribution during excitation.

**Table S1b.** Electronic transitions involved in the excitation of FL with inclusion of DFT-D3.

|                                 | Energy         | f      | Composition | Percentage <sup>a</sup> | Character |
|---------------------------------|----------------|--------|-------------|-------------------------|-----------|
| S <sub>0</sub> →S <sub>1</sub>  | 2.93 eV/423 nm | 0.3372 | 59→60       | 98.68%                  | π→π*      |
| S <sub>0</sub> →S <sub>2</sub>  | 3.34 eV/371 nm | 0.0012 | 56→60       | 55.93%                  | n→π*      |
|                                 |                |        | 57→60       | 41.64%                  | n→π*      |
| S <sub>0</sub> →S <sub>3</sub>  | 3.49 eV/355 nm | 0.0000 | 57→60       | 53.71%                  | n→π*      |
|                                 |                |        | 56→60       | 41.38%                  | n→π*      |
| S <sub>0</sub> →S <sub>4</sub>  | 3.68 eV/337 nm | 0.2864 | 58→60       | 96.66%                  | π→π*      |
| S <sub>0</sub> →S <sub>5</sub>  | 4.18 eV/297 nm | 0.0000 | 54→60       | 92.56%                  | n→π*      |
| S <sub>0</sub> →S <sub>6</sub>  | 4.22 eV/294 nm | 0.0189 | 55→60       | 93.83%                  | π→π*      |
| S <sub>0</sub> →S <sub>7</sub>  | 4.68 eV/265 nm | 0.0006 | 52→60       | 93.59%                  | n→π*      |
| S <sub>0</sub> →S <sub>8</sub>  | 4.74 eV/261 nm | 0.9716 | 59→61       | 88.59%                  | π→π*      |
|                                 |                |        | 53→60       | 4.46%                   | π→π*      |
| S <sub>0</sub> →S <sub>9</sub>  | 4.81 eV/258 nm | 0.0154 | 53→60       | 84.27%                  | π→π*      |
|                                 |                |        | 58→61       | 8.68%                   | π→π*      |
| S <sub>0</sub> →S <sub>10</sub> | 5.22 eV/238 nm | 0.0568 | 59→62       | 58.28%                  | n→π*      |
|                                 |                |        | 58→61       | 35.01%                  | n→π*      |
| S <sub>0</sub> →T <sub>1</sub>  | 2.15 eV/576 nm | 0.0000 | 59→60       | 96.84%                  | π→π*      |
| S <sub>0</sub> →T <sub>2</sub>  | 2.74 eV/453 nm | 0.0000 | 58→60       | 87.03%                  | π→π*      |
| S <sub>0</sub> →T <sub>3</sub>  | 2.90 eV/428 nm | 0.0000 | 56→60       | 70.28%                  | n→π*      |
|                                 |                |        | 57→60       | 18.14%                  | n→π*      |
|                                 |                |        | 52→60       | 8.31%                   | n→π*      |
| S <sub>0</sub> →T <sub>4</sub>  | 3.28 eV/378 nm | 0.0000 | 57→60       | 71.96%                  | n→π*      |
|                                 |                |        | 56→60       | 16.59%                  | n→π*      |
| S <sub>0</sub> →T <sub>5</sub>  | 3.61 eV/343 nm | 0.0000 | 55→60       | 68.98%                  | π→π*      |
|                                 |                |        | 59→61       | 20.74%                  | π→π*      |

<sup>a</sup> Orbital transition contribution during excitation.

**Table S2a.** Electronic transitions involved in the excitation of 7McFL.

|                                 | Energy         | f      | Composition | Percentage <sup>a</sup> | Character |
|---------------------------------|----------------|--------|-------------|-------------------------|-----------|
| S <sub>0</sub> →S <sub>1</sub>  | 3.06 eV/405 nm | 0.2426 | 74→75       | 96.70%                  | π→π*      |
| S <sub>0</sub> →S <sub>2</sub>  | 3.33 eV/372 nm | 0.0008 | 71→75       | 52.54%                  | n→π*      |
|                                 |                |        | 72→75       | 36.81%                  | π→π*      |
| S <sub>0</sub> →S <sub>3</sub>  | 3.47 eV/358 nm | 0.0001 | 72→75       | 43.09%                  | π→π*      |
|                                 |                |        | 71→75       | 30.82%                  | n→π*      |
|                                 |                |        | 68→75       | 14.22%                  | n→π*      |
| S <sub>0</sub> →S <sub>4</sub>  | 3.79 eV/327 nm | 0.0889 | 73→75       | 83.17%                  | π→π*      |
|                                 |                |        | 74→76       | 13.64%                  | π→π*      |
| S <sub>0</sub> →S <sub>5</sub>  | 4.14 eV/300 nm | 0.0000 | 74→76       | 59.52%                  | π→π*      |
|                                 |                |        | 70→75       | 13.82%                  | π→π*      |
|                                 |                |        | 73→75       | 10.11%                  | π→π*      |
| S <sub>0</sub> →S <sub>6</sub>  | 4.19 eV/296 nm | 0.0297 | 68→75       | 46.68%                  | n→π*      |
|                                 |                |        | 65→75       | 13.03%                  | n→π*      |
| S <sub>0</sub> →S <sub>7</sub>  | 4.24 eV/293 nm | 0.0000 | 70→75       | 56.81%                  | π→π*      |
|                                 |                |        | 74→76       | 20.12%                  | π→π*      |
| S <sub>0</sub> →S <sub>8</sub>  | 4.48 eV/277 nm | 0.9509 | 65→75       | 49.48%                  | n→π*      |
|                                 |                |        | 68→75       | 13.85%                  | n→π*      |
| S <sub>0</sub> →S <sub>9</sub>  | 4.69 eV/264 nm | 0.0004 | 73→76       | 47.58%                  | π→π*      |
|                                 |                |        | 70→75       | 21.93%                  | π→π*      |
|                                 |                |        | 67→75       | 11.27%                  | π→π*      |
| S <sub>0</sub> →S <sub>10</sub> | 4.71 eV/264 nm | 0.0312 | 69→76       | 57.26%                  | n→π*      |
|                                 |                |        | 69→75       | 12.94%                  | n→π*      |
| S <sub>0</sub> →T <sub>1</sub>  | 2.20 eV/563 nm | 0.0000 | 74→75       | 95.66%                  | π→π*      |
| S <sub>0</sub> →T <sub>2</sub>  | 2.78 eV/445 nm | 0.0000 | 72→75       | 80.32%                  | π→π*      |
|                                 |                |        | 74→76       | 6.88%                   | π→π*      |
| S <sub>0</sub> →T <sub>3</sub>  | 2.88 eV/430 nm | 0.0000 | 71→75       | 69.30%                  | n→π*      |
|                                 |                |        | 73→75       | 19.10%                  | n→π*      |
|                                 |                |        | 65→75       | 7.87%                   | n→π*      |
| S <sub>0</sub> →T <sub>4</sub>  | 3.24 eV/382 nm | 0.0000 | 73→76       | 70.94%                  | π→π*      |
|                                 |                |        | 71→75       | 17.65%                  | π→π*      |
| S <sub>0</sub> →T <sub>5</sub>  | 3.44 eV/360 nm | 0.0000 | 74→75       | 77.42%                  | π→π*      |
|                                 |                |        | 72→75       | 9.80%                   | π→π*      |

<sup>a</sup> Orbital transition contribution during excitation.

**Table S2b.** Electronic transitions involved in the excitation of 7McFL calculated with DFT-D3.

|                                 | Energy         | f      | Composition | Percentage <sup>a</sup> | Character |
|---------------------------------|----------------|--------|-------------|-------------------------|-----------|
| S <sub>0</sub> →S <sub>1</sub>  | 2.97 eV/417 nm | 0.3992 | 74→75       | 98.59%                  | π→π*      |
| S <sub>0</sub> →S <sub>2</sub>  | 3.32 eV/373 nm | 0.0012 | 71→75       | 50.12%                  | n→π*      |
|                                 |                |        | 72→75       | 47.04%                  | π→π*      |
| S <sub>0</sub> →S <sub>3</sub>  | 3.45 eV/358 nm | 0.0001 | 73→75       | 48.49%                  | π→π*      |
|                                 |                |        | 71→75       | 46.79%                  | n→π*      |
|                                 |                |        | 68→75       | 2.59%                   | n→π*      |
| S <sub>0</sub> →S <sub>4</sub>  | 3.75 eV/331 nm | 0.1779 | 72→75       | 92.94%                  | π→π*      |
|                                 |                |        | 74→76       | 5.45%                   | π→π*      |
| S <sub>0</sub> →S <sub>5</sub>  | 4.13 eV/300 nm | 0.0000 | 68→75       | 79.00%                  | π→π*      |
|                                 |                |        | 69→75       | 13.81%                  | π→π*      |
|                                 |                |        | 73→75       | 2.52%                   | π→π*      |
| S <sub>0</sub> →S <sub>6</sub>  | 4.16 eV/298 nm | 0.0719 | 70→75       | 78.72%                  | n→π*      |
|                                 |                |        | 74→76       | 16.52%                  | n→π*      |
| S <sub>0</sub> →S <sub>7</sub>  | 4.23 eV/293 nm | 0.0000 | 69→75       | 82.91%                  | π→π*      |
|                                 |                |        | 68→75       | 13.54%                  | π→π*      |
| S <sub>0</sub> →S <sub>8</sub>  | 4.33 eV/286 nm | 1.1521 | 74→76       | 76.29%                  | n→π*      |
|                                 |                |        | 70→75       | 18.25%                  | n→π*      |
| S <sub>0</sub> →S <sub>9</sub>  | 4.69 eV/265 nm | 0.0006 | 73→76       | 82.77%                  | π→π*      |
|                                 |                |        | 70→75       | 10.79%                  | π→π*      |
| S <sub>0</sub> →S <sub>10</sub> | 4.70 eV/264 nm | 0.0225 | 69→76       | 48.89%                  | n→π*      |
|                                 |                |        | 69→75       | 40.55%                  | n→π*      |
| S <sub>0</sub> →T <sub>1</sub>  | 2.20 eV/563 nm | 0.0000 | 74→75       | 95.74%                  | π→π*      |
| S <sub>0</sub> →T <sub>2</sub>  | 2.78 eV/445 nm | 0.0000 | 72→75       | 81.08%                  | π→π*      |
|                                 |                |        | 74→76       | 6.83%                   | π→π*      |
| S <sub>0</sub> →T <sub>3</sub>  | 2.88 eV/430 nm | 0.0000 | 71→75       | 70.33%                  | n→π*      |
|                                 |                |        | 73→75       | 18.15%                  | n→π*      |
|                                 |                |        | 65→75       | 7.96%                   | n→π*      |
| S <sub>0</sub> →T <sub>4</sub>  | 3.24 eV/383 nm | 0.0000 | 73→75       | 72.45%                  | π→π*      |
|                                 |                |        | 71→75       | 16.58%                  | π→π*      |
| S <sub>0</sub> →T <sub>5</sub>  | 3.45 eV/360 nm | 0.0000 | 74→76       | 77.15%                  | π→π*      |
|                                 |                |        | 72→75       | 9.77%                   | π→π*      |

<sup>a</sup> Orbital transition contribution during excitation.

**Table S3.** Electronic transitions involved in the excitation of 8McFL.

|                          | Energy         | f      | Composition | Percentage | Character               |
|--------------------------|----------------|--------|-------------|------------|-------------------------|
| $S_0 \rightarrow S_1$    | 2.90 eV/427 nm | 0.2186 | 74→75       | 97.41%     | $\pi \rightarrow \pi^*$ |
| $S_0 \rightarrow S_2$    | 3.23 eV/384 nm | 0.0007 | 71→75       | 50.08%     | $n \rightarrow \pi^*$   |
|                          |                |        | 72→75       | 37.18%     | $\pi \rightarrow \pi^*$ |
| $S_0 \rightarrow S_3$    | 3.37 eV/368 nm | 0.0000 | 72→75       | 40.33%     | $\pi \rightarrow \pi^*$ |
|                          |                |        | 71→75       | 30.83%     | $n \rightarrow \pi^*$   |
|                          |                |        | 68→75       | 14.75%     | $n \rightarrow \pi^*$   |
| $S_0 \rightarrow S_4$    | 3.70 eV/335 nm | 0.2441 | 73→75       | 93.66%     | $\pi \rightarrow \pi^*$ |
| $S_0 \rightarrow S_5$    | 4.02 eV/308 nm | 0.0000 | 74→76       | 40.08%     | $\pi \rightarrow \pi^*$ |
|                          |                |        | 70→75       | 38.17%     | $\pi \rightarrow \pi^*$ |
|                          |                |        | 67→75       | 11.36%     | $\pi \rightarrow \pi^*$ |
| $S_0 \rightarrow S_6$    | 4.06 eV/305 nm | 0.0001 | 69→75       | 52.66%     | $n \rightarrow \pi^*$   |
|                          |                |        | 69→76       | 13.01%     | $n \rightarrow \pi^*$   |
| $S_0 \rightarrow S_7$    | 4.10 eV/303 nm | 0.0113 | 68→75       | 43.35%     | $\pi \rightarrow \pi^*$ |
| $S_0 \rightarrow S_8$    | 4.58 eV/271 nm | 0.0003 | 65→75       | 54.38%     | $n \rightarrow \pi^*$   |
|                          |                |        | 68→75       | 12.12%     | $n \rightarrow \pi^*$   |
| $S_0 \rightarrow S_9$    | 4.63 eV/268 nm | 0.4617 | 70→75       | 53.92%     | $\pi \rightarrow \pi^*$ |
|                          |                |        | 74→76       | 35.97%     | $\pi \rightarrow \pi^*$ |
| $S_0 \rightarrow S_{10}$ | 4.69 eV/264 nm | 0.1020 | 67→75       | 35.28%     | $n \rightarrow \pi^*$   |
|                          |                |        | 74→77       | 25.72%     | $n \rightarrow \pi^*$   |
|                          |                |        | 73→76       | 16.66%     | $n \rightarrow \pi^*$   |
|                          |                |        | 74→76       | 12.20%     | $n \rightarrow \pi^*$   |
| $S_0 \rightarrow T_1$    | 2.07 eV/599 nm | 0.0000 | 74→75       | 96.83%     | $\pi \rightarrow \pi^*$ |
| $S_0 \rightarrow T_2$    | 2.66 eV/466 nm | 0.0000 | 72→75       | 84.43%     | $\pi \rightarrow \pi^*$ |
| $S_0 \rightarrow T_3$    | 2.82 eV/439 nm | 0.0000 | 71→75       | 67.65%     | $n \rightarrow \pi^*$   |
|                          |                |        | 73→75       | 19.44%     | $n \rightarrow \pi^*$   |
| $S_0 \rightarrow T_4$    | 3.16 eV/392 nm | 0.0000 | 73→76       | 66.52%     | $n \rightarrow \pi^*$   |
|                          |                |        | 71→75       | 18.82%     | $n \rightarrow \pi^*$   |
| $S_0 \rightarrow T_5$    | 3.48 eV/356 nm | 0.0000 | 70→75       | 55.58%     | $n \rightarrow \pi^*$   |
|                          |                |        | 74→75       | 30.47%     | $n \rightarrow \pi^*$   |

**Table S4.** Electronic transitions involved in the excitation of DcFL.

|                                 | Energy         | f      | Composition | Percentage | Character |
|---------------------------------|----------------|--------|-------------|------------|-----------|
| S <sub>0</sub> →S <sub>1</sub>  | 2.93 eV/423 nm | 0.1825 | 76→77       | 97.62%     | π→π*      |
| S <sub>0</sub> →S <sub>2</sub>  | 3.16 eV/393 nm | 0.0006 | 75→77       | 60.69%     | n→π*      |
|                                 |                |        | 74→77       | 34.89%     | n→π*      |
| S <sub>0</sub> →S <sub>3</sub>  | 3.29 eV/377 nm | 0.0001 | 74→77       | 60.77%     | n→π*      |
|                                 |                |        | 75→77       | 33.17%     | n→π*      |
| S <sub>0</sub> →S <sub>4</sub>  | 3.67 eV/338 nm | 0.0397 | 76→78       | 64.37%     | π→π*      |
|                                 |                |        | 73→77       | 32.29%     | π→π*      |
| S <sub>0</sub> →S <sub>5</sub>  | 3.94 eV/315 nm | 0.0000 | 71→77       | 65.16%     | n→π*      |
|                                 |                |        | 70→77       | 25.43%     | n→π*      |
| S <sub>0</sub> →S <sub>6</sub>  | 3.99 eV/312 nm | 0.0196 | 72→77       | 89.42%     | π→π*      |
| S <sub>0</sub> →S <sub>7</sub>  | 4.01 eV/309 nm | 0.0001 | 70→77       | 58.59%     | n→π*      |
|                                 |                |        | 71→77       | 20.10%     | n→π*      |
|                                 |                |        | 71→78       | 10.73%     | n→π*      |
| S <sub>0</sub> →S <sub>8</sub>  | 4.11 eV/302 nm | 0.8628 | 73→77       | 54.65%     | π→π*      |
|                                 |                |        | 76→78       | 32.66%     | π→π*      |
| S <sub>0</sub> →S <sub>9</sub>  | 4.31 eV/288 nm | 0.0002 | 75→78       | 53.57%     | n→π*      |
|                                 |                |        | 74→78       | 40.05%     | n→π*      |
| S <sub>0</sub> →S <sub>10</sub> | 4.40 eV/282 nm | 0.0000 | 74→78       | 54.18%     | n→π*      |
|                                 |                |        | 75→78       | 36.66%     | n→π*      |
| S <sub>0</sub> →T <sub>1</sub>  | 2.11 eV/587 nm | 0.0000 | 76→77       | 95.41%     | π→π*      |
| S <sub>0</sub> →T <sub>2</sub>  | 2.78 eV/446 nm | 0.0000 | 74→77       | 63.03%     | n→π*      |
|                                 |                |        | 75→77       | 22.99%     | n→π*      |
| S <sub>0</sub> →T <sub>3</sub>  | 2.79 eV/445 nm | 0.0000 | 73→77       | 70.57%     | π→π*      |
|                                 |                |        | 76→78       | 14.03%     | π→π*      |
| S <sub>0</sub> →T <sub>4</sub>  | 3.05 eV/405 nm | 0.0000 | 76→78       | 75.39%     | π→π*      |
|                                 |                |        | 73→77       | 17.77%     | π→π*      |
| S <sub>0</sub> →T <sub>5</sub>  | 3.06 eV/405 nm | 0.0000 | 75→77       | 65.06%     | n→π*      |
|                                 |                |        | 74→77       | 20.88%     | n→π*      |

**Table S5.** Electronic transitions involved in the excitation of DBFL.

|                                 | Energy         | f      | Composition | Percentage | Character |
|---------------------------------|----------------|--------|-------------|------------|-----------|
| S <sub>0</sub> →S <sub>1</sub>  | 2.91 eV/427 nm | 0.2562 | 93→94       | 96.90%     | π→π*      |
| S <sub>0</sub> →S <sub>2</sub>  | 3.29 eV/377 nm | 0.0007 | 91→94       | 55.06%     | n→π*      |
|                                 |                |        | 90→94       | 42.28%     | n→π*      |
| S <sub>0</sub> →S <sub>3</sub>  | 3.41 eV/363 nm | 0.0001 | 90→94       | 55.24%     | n→π*      |
|                                 |                |        | 91→94       | 40.41%     | n→π*      |
| S <sub>0</sub> →S <sub>4</sub>  | 3.61 eV/343 nm | 0.2527 | 92→94       | 93.67%     | n→π*      |
|                                 |                |        | 93→95       | 3.23%      | π→π*      |
| S <sub>0</sub> →S <sub>5</sub>  | 4.07 eV/304 nm | 0.0000 | 86→94       | 79.08%     | n→π*      |
|                                 |                |        | 88→94       | 14.59%     | n→π*      |
| S <sub>0</sub> →S <sub>6</sub>  | 4.09 eV/302 nm | 0.0057 | 87→94       | 55.99%     | π→π*      |
|                                 |                |        | 89→94       | 41.67%     | π→π*      |
| S <sub>0</sub> →S <sub>7</sub>  | 4.14 eV/299 nm | 0.0000 | 88→94       | 84.66%     | n→π*      |
|                                 |                |        | 86→94       | 13.97%     | n→π*      |
| S <sub>0</sub> →S <sub>8</sub>  | 4.17 eV/297 nm | 0.0153 | 89→94       | 52.71%     | π→π*      |
|                                 |                |        | 87→94       | 37.92%     | π→π*      |
| S <sub>0</sub> →S <sub>9</sub>  | 4.59 eV/270 nm | 0.0000 | 93→96       | 95.72%     | π→n*      |
|                                 |                |        | 89→96       | 3.57%      | π→n*      |
| S <sub>0</sub> →S <sub>10</sub> | 4.66 eV/266 nm | 0.0004 | 83→94       | 86.12%     | n→π*      |
|                                 |                |        | 85→94       | 7.18%      | n→π*      |
| S <sub>0</sub> →T <sub>1</sub>  | 2.09 eV/594 nm | 0.0000 | 93→94       | 95.51%     | π→π*      |
| S <sub>0</sub> →T <sub>2</sub>  | 2.68 eV/463 nm | 0.0000 | 92→94       | 82.80%     | n→π*      |
|                                 |                |        | 93→95       | 4.59%      | π→π*      |
| S <sub>0</sub> →T <sub>3</sub>  | 2.88 eV/431 nm | 0.0000 | 90→94       | 70.37%     | n→π*      |
|                                 |                |        | 91→94       | 18.52%     | n→π*      |
| S <sub>0</sub> →T <sub>4</sub>  | 3.19 eV/389 nm | 0.0000 | 91→94       | 71.87%     | n→π*      |
|                                 |                |        | 90→94       | 16.89%     | n→π*      |
| S <sub>0</sub> →T <sub>5</sub>  | 3.49 eV/355 nm | 0.0000 | 93→95       | 35.74%     | π→π*      |
|                                 |                |        | 87→94       | 33.46%     | π→π*      |
|                                 |                |        | 89→94       | 21.15%     | π→π*      |

(a)

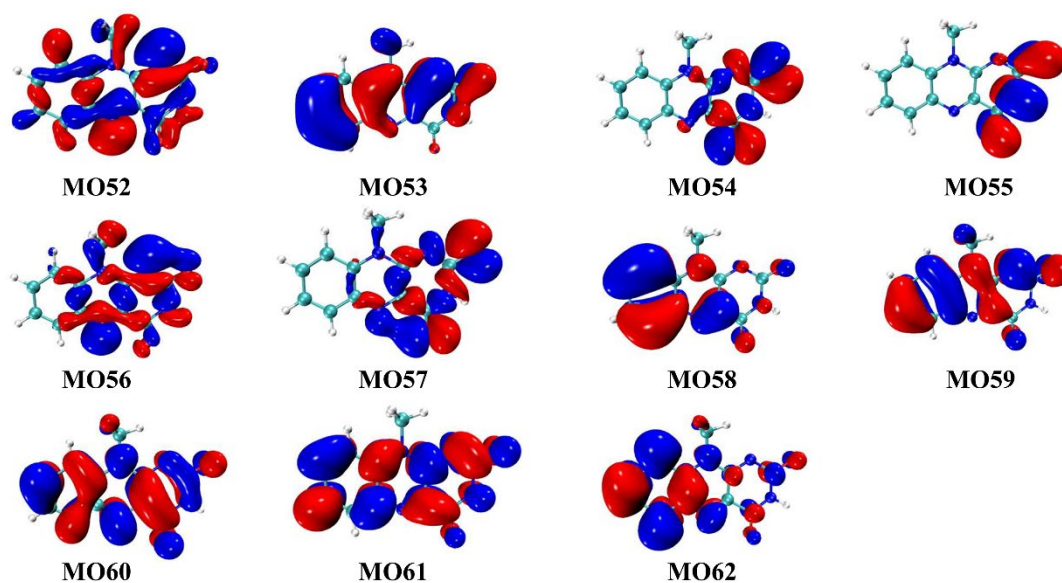

(b)

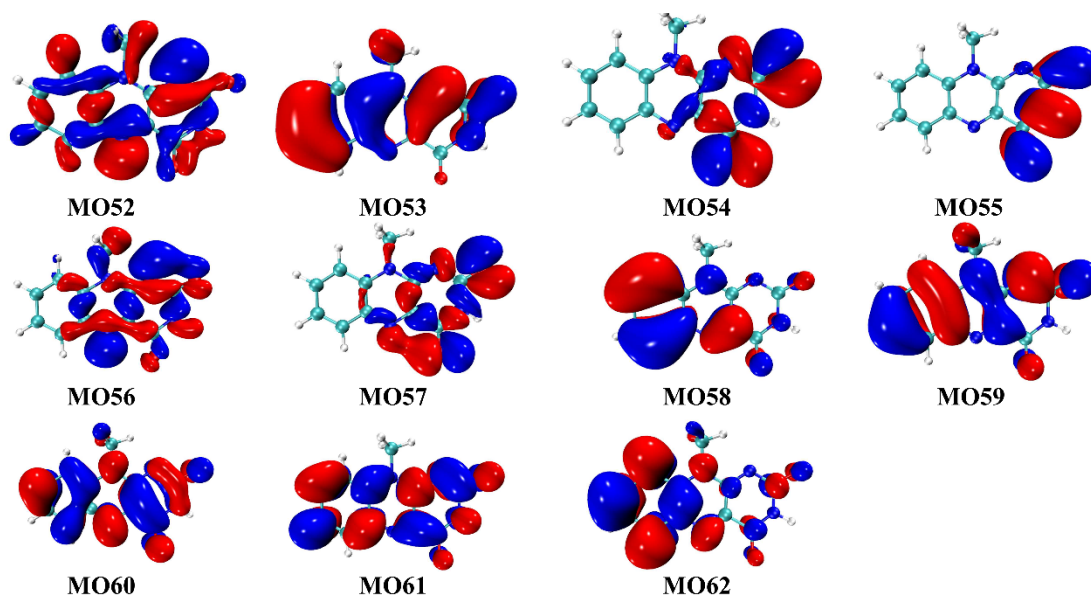

**Fig. S1** Isosurface plots of frontier molecular orbitals of FL involved in electronic transitions contribute to UV-vis absorption calculated without(a) and with DFT-D3(b). (Isovalue:  $\pm 0.02$  a.u.; C: Cyan; O: Red; N: Blue; H: White.)

(a)

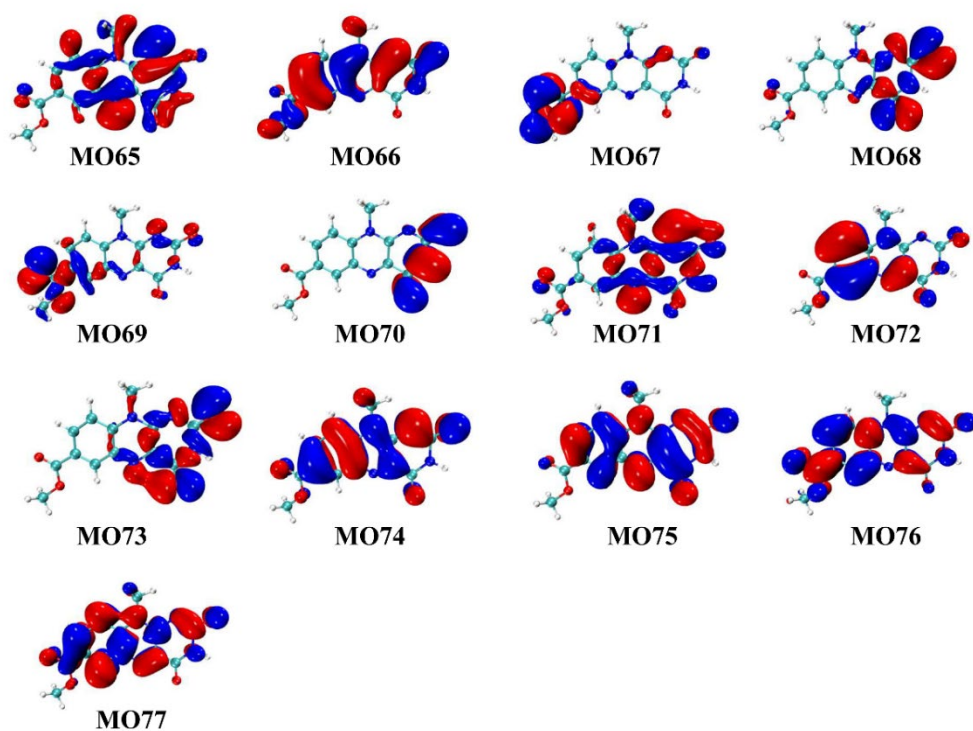

(b)

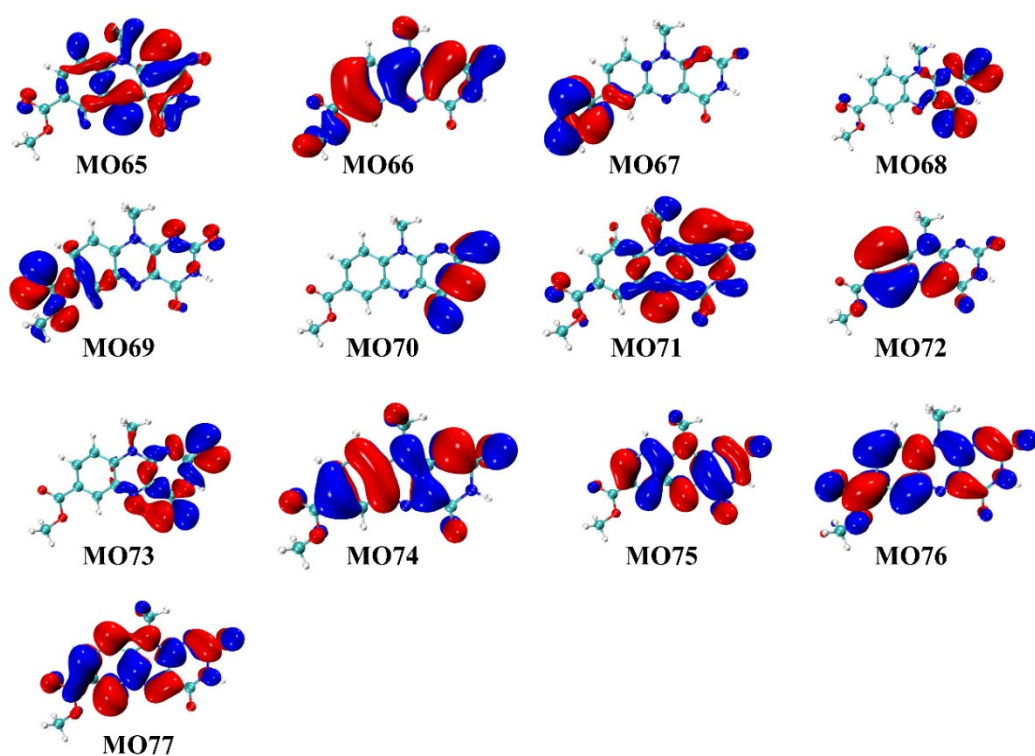

**Fig. S2** Isosurface plots of frontier molecular orbitals of 7McFL involved in electronic transitions contribute to UV-vis absorption calculated without (a) and with DFT-D3(b). (Isovalue:  $\pm 0.02$  a.u.; C: Cyan; O: Red; N: Blue; H: White.)

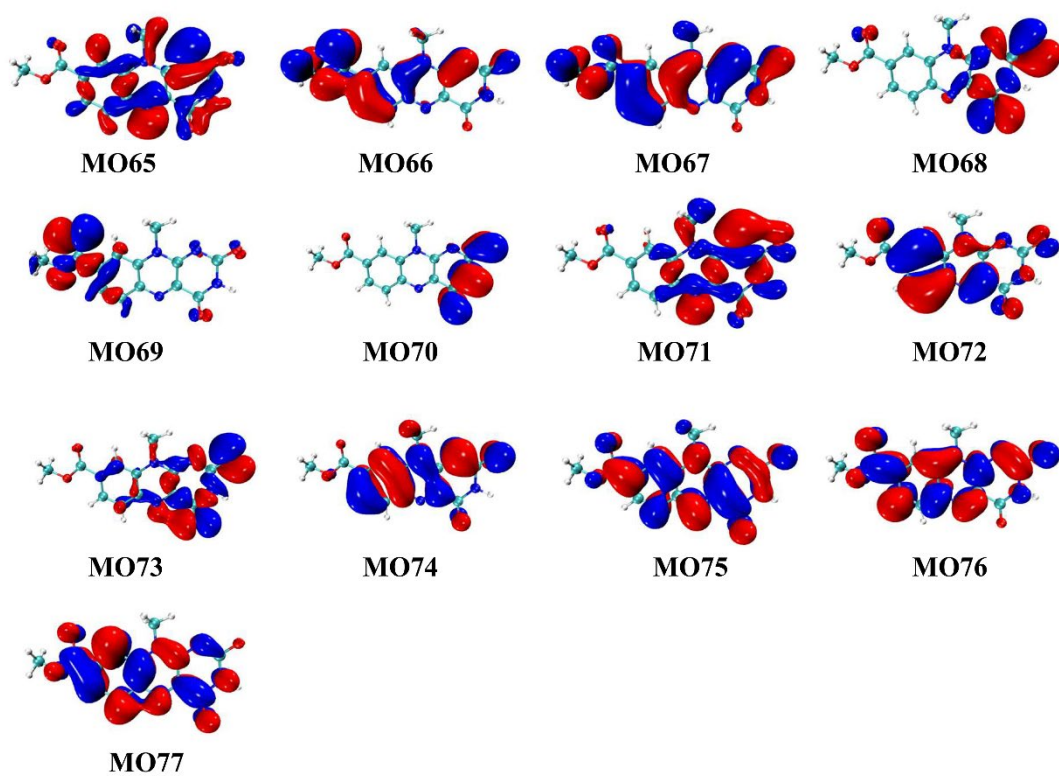

**Fig. S3.** Isosurface plots of frontier molecular orbitals of 8McFL involved in electron transitions contribute to UV-vis absorption. (Isovalue:  $\pm 0.02$  a.u.; C: Cyan; O: Red; N: Blue; H: White.)

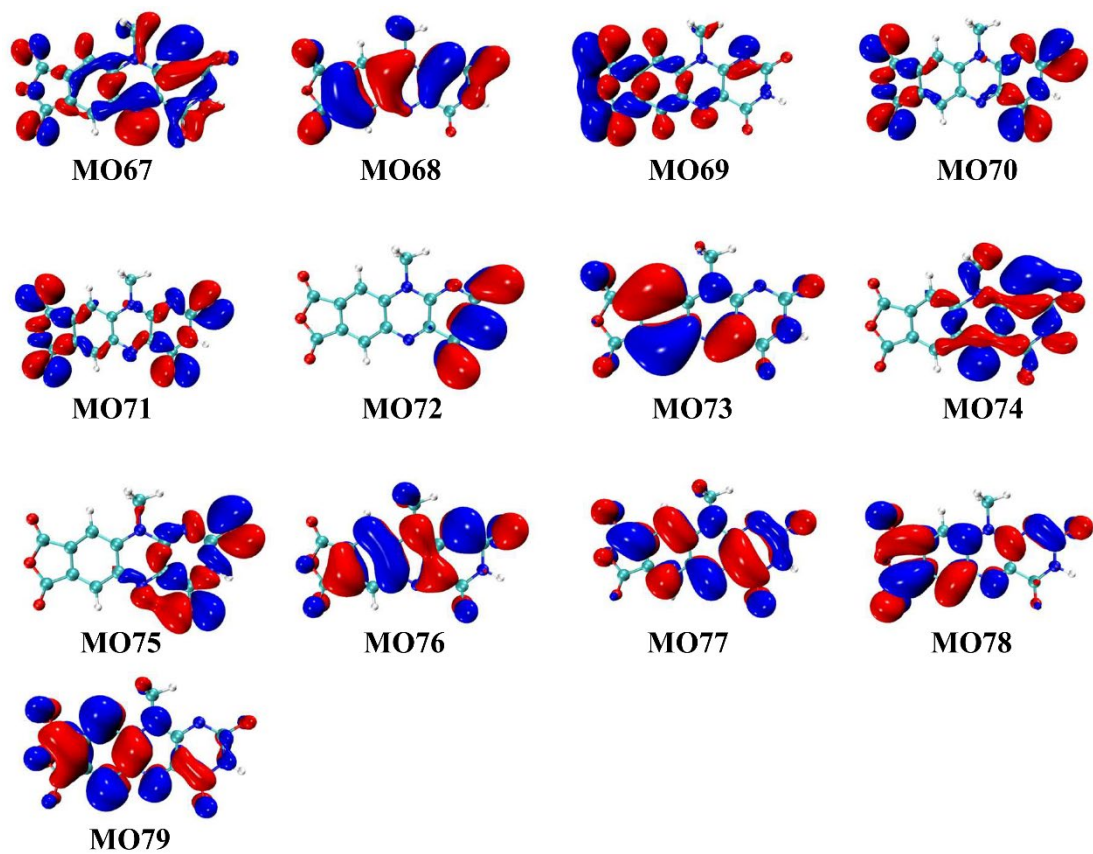

**Fig. S4.** Isosurface plots of frontier molecular orbitals of DcFL involved in electronic transitions contribute to UV-vis absorption. (Isovalue:  $\pm 0.02$  a.u.; C: Cyan; O: Red; N: Blue; H: White.)

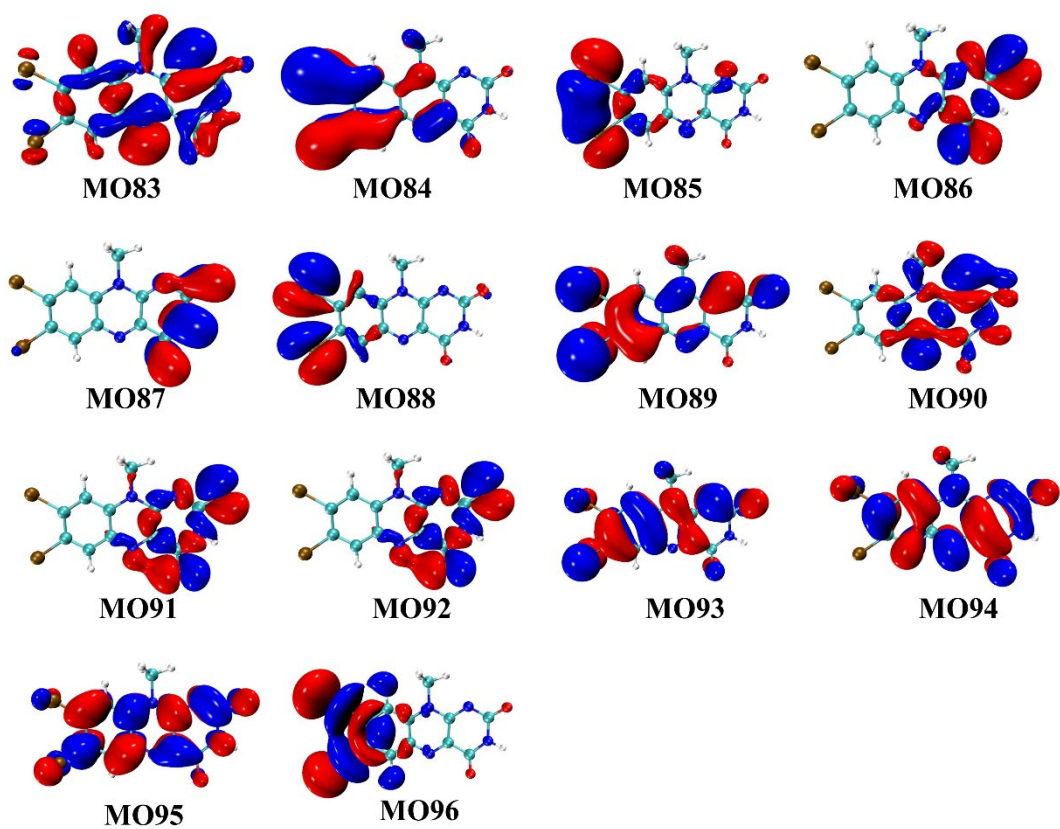

**Fig. S5.** Isosurface plots of frontier molecular orbitals of DBFL involved in electron transitions contribute to UV-vis absorption. (Isovalue:  $\pm 0.02$  a.u.; C: Cyan; O: Red; N: Blue; H: White.)

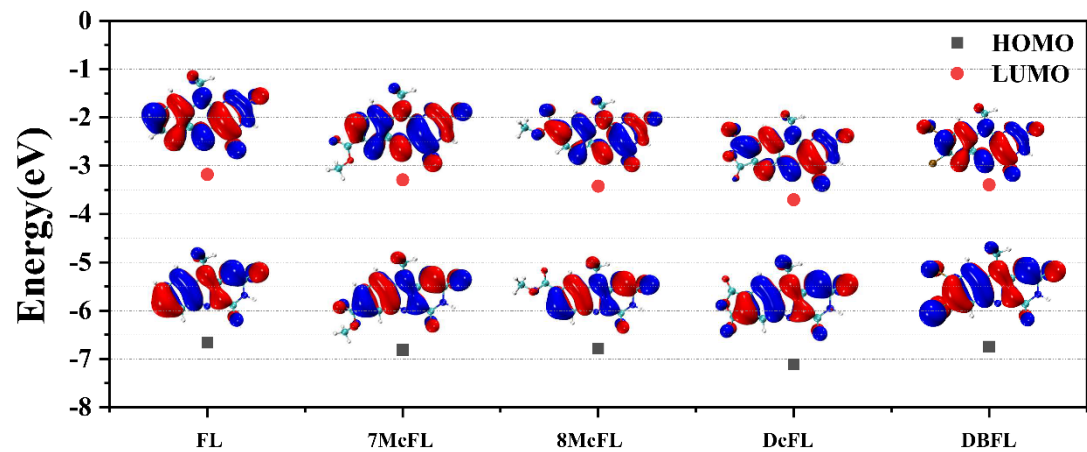

Fig. S6 Isosurface plots (Isovalue:  $\pm 0.02$  a.u.) and energy profile of HOMO and LUMO of McFLs

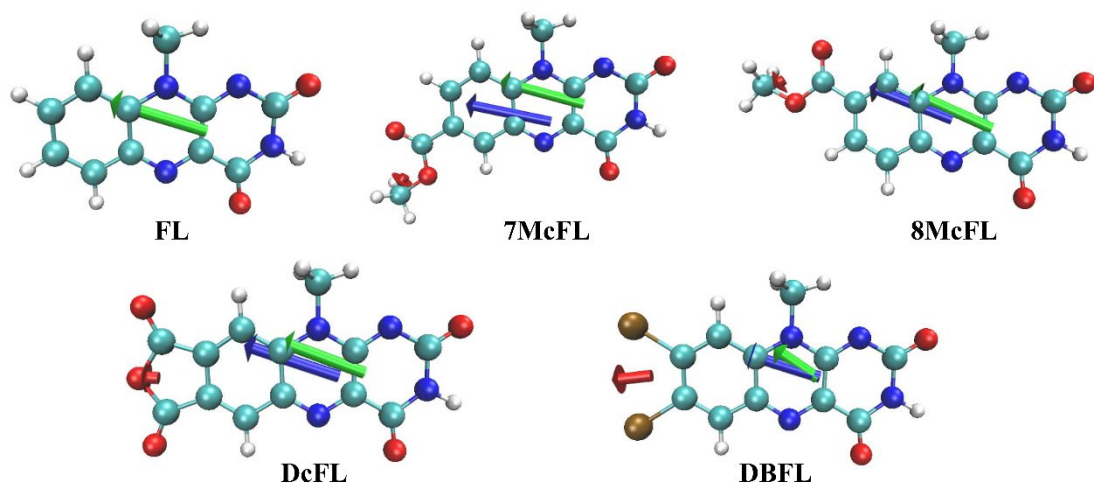

**Fig. S7** Contribution of carboxy containing moiety and -Br (red), and isoalloxazine backbone (green) to  $\mu(S_0 \rightarrow S_1)$  of McFLs (blue).

**Table S6.** Contribution of -COO, -Br moieties and isoalloxazine backbone to  $\mu(S_0 \rightarrow S_1)$  of McFLs.

| Mol   | $ \mu(S_0 \rightarrow S_1) ^a$<br>(a.u.) | Contribution of<br>isoalloxazine to<br>$ \mu(S_0 \rightarrow S_1) $ (a.u.) | Contribution of -<br>COOCH <sub>3</sub> and -Br to<br>$ \mu(S_0 \rightarrow S_1) $ (a.u.) |
|-------|------------------------------------------|----------------------------------------------------------------------------|-------------------------------------------------------------------------------------------|
| FL    | 2.06                                     | —                                                                          | —                                                                                         |
| 7McFL | 2.23                                     | 2.15                                                                       | 0.36                                                                                      |
| 8McFL | 2.18                                     | 2.01                                                                       | 0.29                                                                                      |
| DcFL  | 2.08                                     | 1.57                                                                       | 0.57                                                                                      |
| DBFL  | 2.39                                     | 1.48                                                                       | 1.05                                                                                      |

<sup>a</sup> The transition dipole moments were calculated as vectors, they were projected to calculate the contribution of -COOCH<sub>3</sub>, -Br and isoalloxazine backbone. For clearance, only  $|\mu|$  were presented.

**Table S7.** Hole-electron analysis of excited states of FL derivatives performed at B3LYP/6-311g(d) level of theory with Multiwfn.

|                        | D/Å <sup>a</sup> | S <sub>r</sub> /a.u. <sup>b</sup> | H/Å <sup>c</sup> | t/Å <sup>d</sup> | HDI <sup>e</sup> | EDI <sup>f</sup> |
|------------------------|------------------|-----------------------------------|------------------|------------------|------------------|------------------|
| FL : S <sub>1</sub>    | 1.19             | 0.66                              | 2.74             | -0.71            | 9.86             | 9.57             |
| FL : T <sub>1</sub>    | 0.85             | 0.73                              | 2.70             | -1.14            | 9.25             | 9.63             |
| FL : T <sub>2</sub>    | 0.83             | 1.00                              | 2.49             | -0.57            | 8.48             | 8.61             |
| FL : T <sub>3</sub>    | 0.31             | 0.55                              | 2.20             | -1.04            | 17.54            | 10.57            |
| 7McFL : S <sub>1</sub> | 1.18             | 0.66                              | 2.82             | -0.74            | 9.97             | 9.40             |
| 7McFL : T <sub>1</sub> | 0.92             | 0.74                              | 2.72             | -0.94            | 9.50             | 9.68             |
| 7McFL : T <sub>2</sub> | 1.23             | 0.83                              | 2.53             | -0.47            | 8.45             | 8.49             |
| 7McFL : T <sub>3</sub> | 0.29             | 0.54                              | 2.22             | -1.09            | 17.37            | 10.54            |
| 8McFL : S <sub>1</sub> | 1.31             | 0.66                              | 2.90             | -0.51            | 10.23            | 8.59             |
| 8McFL : T <sub>1</sub> | 1.00             | 0.74                              | 2.81             | -0.79            | 9.36             | 8.90             |
| 8McFL : T <sub>2</sub> | 0.84             | 0.95                              | 2.61             | -0.88            | 8.38             | 7.92             |
| 8McFL : T <sub>3</sub> | 0.47             | 0.52                              | 2.31             | -1.01            | 17.10            | 10.05            |
| DcFL : S <sub>1</sub>  | 1.70             | 0.64                              | 2.95             | -0.52            | 10.86            | 8.02             |
| DcFL : T <sub>1</sub>  | 1.21             | 0.75                              | 2.85             | -0.94            | 9.51             | 8.56             |
| DcFL : T <sub>2</sub>  | 0.52             | 0.53                              | 2.35             | -1.05            | 16.47            | 9.71             |
| DcFL : T <sub>3</sub>  | 0.94             | 0.85                              | 2.66             | -0.86            | 8.32             | 7.61             |
| DBFL : S <sub>1</sub>  | 0.67             | 0.81                              | 3.03             | -0.90            | 8.79             | 9.22             |
| DBFL : T <sub>1</sub>  | 0.67             | 0.73                              | 2.90             | -1.49            | 8.90             | 9.25             |
| DBFL : T <sub>2</sub>  | 1.25             | 0.83                              | 2.65             | -0.55            | 8.15             | 8.29             |
| DBFL : T <sub>3</sub>  | 0.40             | 0.53                              | 2.28             | -1.05            | 17.08            | 10.31            |

<sup>a</sup> The distance between centroids of hole and electron. <sup>b</sup> The overlap between hole and electron, calculated as  $\int \sqrt{\rho^{hole}(\mathbf{r})\rho^{ele}(\mathbf{r})} d\mathbf{r}$ , where  $\rho^{hole}(\mathbf{r})$  and  $\rho^{ele}(\mathbf{r})$  are the density distribution of hole and electron, respectively. <sup>c</sup> Averaged root mean square derivation of spatial extension of hole and electron distribution, calculated as  $H = (|\sigma_{ele}| + |\sigma_{hole}|)/2$ , where  $|\sigma_{ele}|$  and  $|\sigma_{hole}|$  measure the overall root mean square derivation of electron and hole, respectively. <sup>d</sup> The degree of separation of hole and electron in the direction of charge transfer, calculated as  $t = D - H_{CT}$ , where  $D$  is the distance between centroids of hole and electron, and  $H_{CT}$  is the averaged degree of spatial extension of hole and electron distribution in CT direction. <sup>e</sup> The hole delocalization index, calculated as  $100 \times \sqrt{\int [\rho^{hole}(r)]^2 dr}$ . <sup>f</sup> The electron delocalization index, calculated as  $100 \times \sqrt{\int [\rho^{ele}(r)]^2 dr}$ .

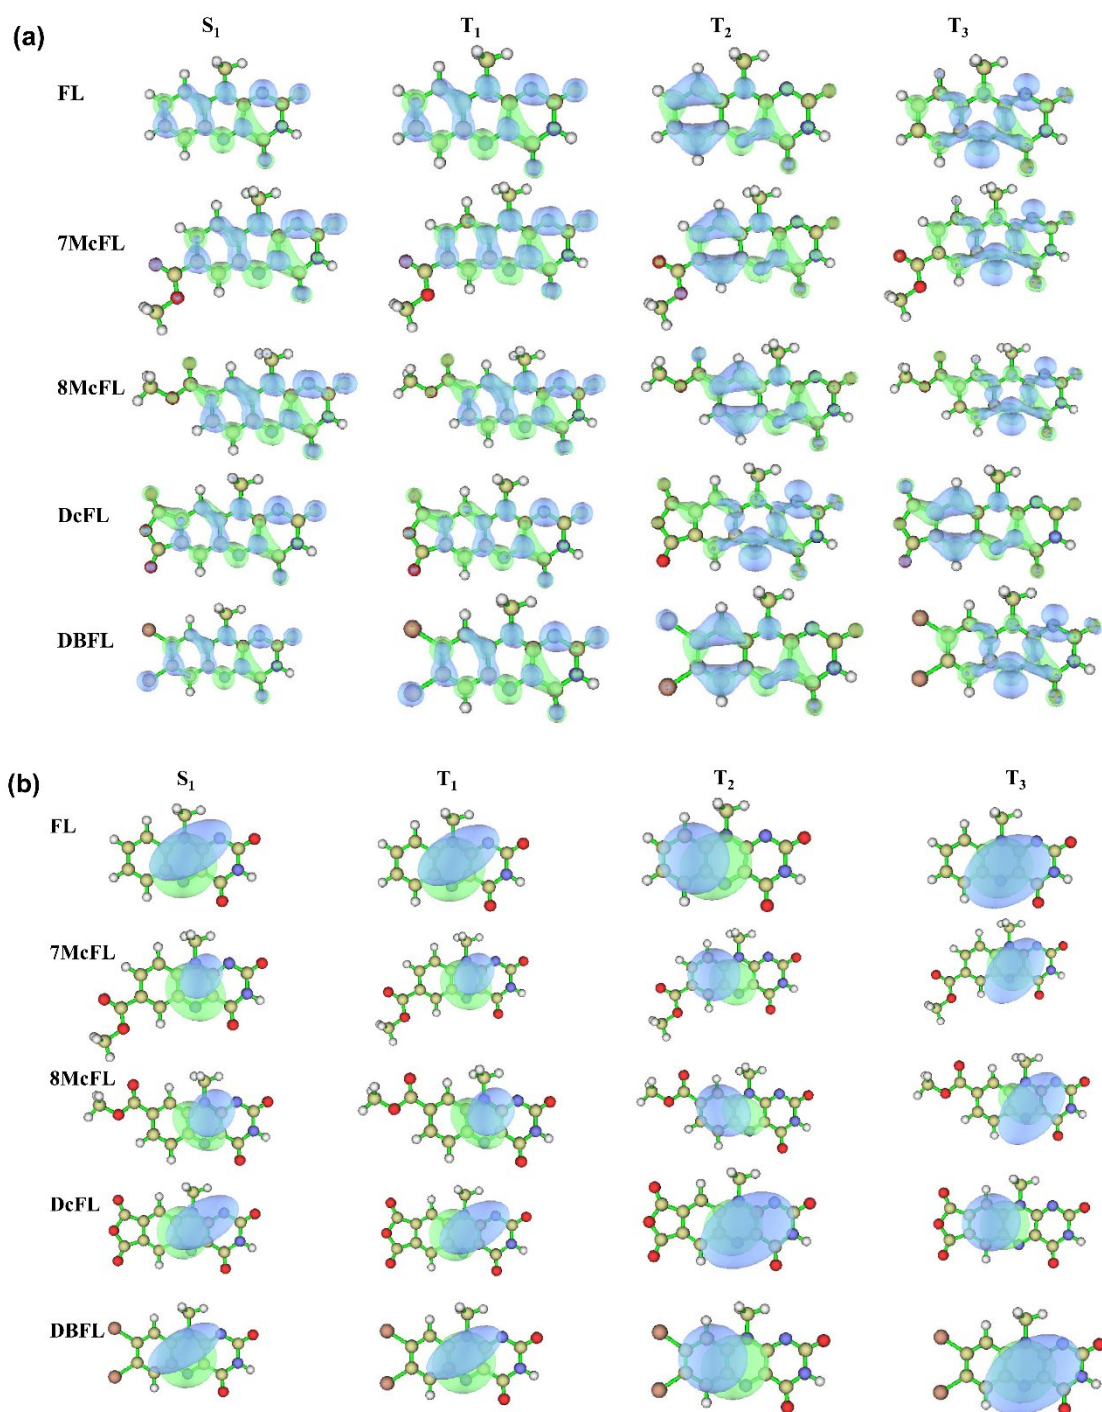

**Fig. S8.** Isosurface plots of hole-electron (h-e) (a) and charge density difference (CDD) (b) plots of excited states of FL, McFLs and DBFL performed at B3LYP/6-311g(d) level of theory (Isovalue:  $\pm 0.002$  a.u.)

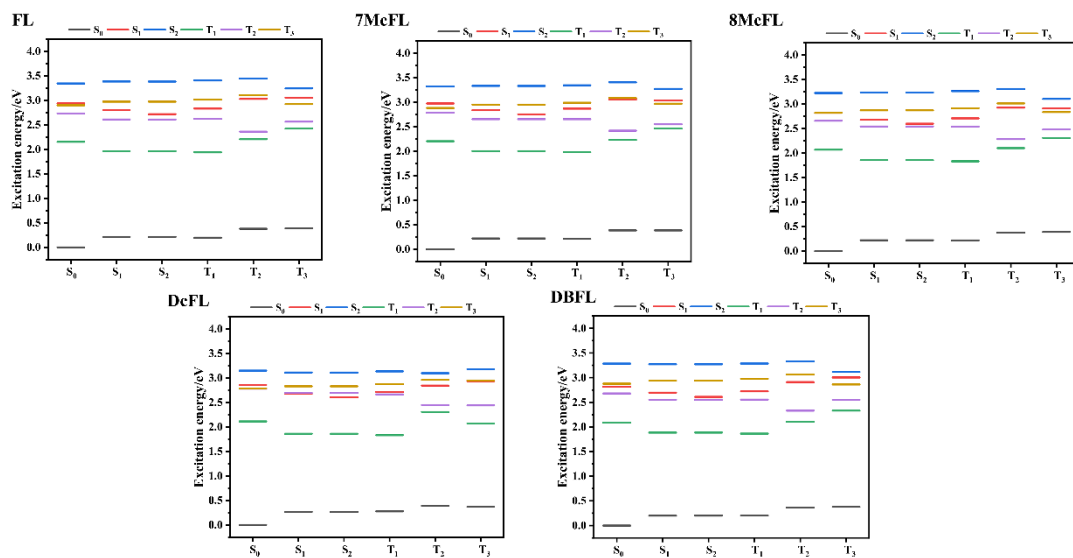

**Fig. S9** Vertical excitation energy of FL derivative in CH<sub>3</sub>CN calculated with B3LYP functional at S<sub>0</sub>, S<sub>1</sub>, S<sub>2</sub>, T<sub>1</sub>, T<sub>2</sub> and T<sub>3</sub> minimum geometry obtained at B3LYP/6-311g(d) level of theory..

**Table S8.** Calculated rate constants for evolution of excited McFLs in s<sup>-1</sup>.

| 77 K                                                          | FL                    | 7McFL                 | 8McFL                 | DcFL                  | DBFL                  |
|---------------------------------------------------------------|-----------------------|-----------------------|-----------------------|-----------------------|-----------------------|
| S <sub>1</sub> →S <sub>0</sub> k <sub>IC</sub> <sup>a</sup>   | 2.26×10 <sup>8</sup>  | 3.34×10 <sup>8</sup>  | 3.42×10 <sup>8</sup>  | 1.10×10 <sup>9</sup>  | 1.70×10 <sup>8</sup>  |
| S <sub>1</sub> →S <sub>0</sub> k <sub>r</sub> <sup>b</sup>    | 6.26×10 <sup>7</sup>  | 7.58×10 <sup>7</sup>  | 6.04×10 <sup>7</sup>  | 5.14×10 <sup>7</sup>  | 7.61×10 <sup>7</sup>  |
| S <sub>1</sub> →T <sub>1</sub> k <sub>ISC</sub> <sup>c</sup>  | 1.36×10 <sup>1</sup>  | 3.92×10 <sup>3</sup>  | 5.22×10 <sup>4</sup>  | 2.73×10 <sup>3</sup>  | 2.37×10 <sup>5</sup>  |
| S <sub>1</sub> →T <sub>2</sub> k <sub>ISC</sub> <sup>d</sup>  | 3.05×10 <sup>6</sup>  | 4.26×10 <sup>6</sup>  | 3.97×10 <sup>6</sup>  | 8.23×10 <sup>9</sup>  | 7.51×10 <sup>5</sup>  |
| S <sub>1</sub> →T <sub>3</sub> k' <sub>ISC</sub> <sup>e</sup> | 9.64×10 <sup>8</sup>  | 6.98×10 <sup>9</sup>  | 2.67×10 <sup>9</sup>  | 3.26×10 <sup>6</sup>  | 9.91×10 <sup>9</sup>  |
| T <sub>1</sub> →S <sub>0</sub> k' <sub>ISC</sub> <sup>f</sup> | 5.56×10 <sup>3</sup>  | 7.29×10 <sup>3</sup>  | 1.12×10 <sup>4</sup>  | 6.12×10 <sup>3</sup>  | 1.86×10 <sup>0</sup>  |
| T <sub>2</sub> →S <sub>0</sub> k' <sub>ISC</sub> <sup>g</sup> | 2.15×10 <sup>3</sup>  | 1.16×10 <sup>3</sup>  | 3.29×10 <sup>3</sup>  | 2.12×10 <sup>2</sup>  | 1.76×10 <sup>0</sup>  |
| T <sub>3</sub> →S <sub>0</sub> k' <sub>ISC</sub> <sup>h</sup> | 6.17×10 <sup>4</sup>  | 3.60×10 <sup>2</sup>  | 1.68×10 <sup>3</sup>  | 2.64×10 <sup>3</sup>  | 4.93×10 <sup>4</sup>  |
| T <sub>1</sub> →S <sub>0</sub> k <sub>p</sub> <sup>i</sup>    | 3.25×10 <sup>-2</sup> | 5.88×10 <sup>-2</sup> | 2.44×10 <sup>-2</sup> | 3.09×10 <sup>-2</sup> | 1.77×10 <sup>-2</sup> |
| T <sub>2</sub> →S <sub>0</sub> k <sub>p</sub> <sup>j</sup>    | 6.73×10 <sup>-2</sup> | 1.21×10 <sup>-1</sup> | 5.73×10 <sup>-2</sup> | 4.74×10 <sup>-1</sup> | 1.69×10 <sup>-2</sup> |
| T <sub>3</sub> →S <sub>0</sub> k <sub>p</sub> <sup>k</sup>    | 7.97×10 <sup>-2</sup> | 5.84×10 <sup>-1</sup> | 2.66×10 <sup>-1</sup> | 1.03×10 <sup>-1</sup> | 1.84×10 <sup>-1</sup> |
| T <sub>2</sub> →T <sub>1</sub> k <sub>IC</sub> <sup>l</sup>   | 5.04×10 <sup>12</sup> | 6.28×10 <sup>12</sup> | 6.48×10 <sup>12</sup> | 2.45×10 <sup>12</sup> | 5.49×10 <sup>12</sup> |
| T <sub>3</sub> →T <sub>1</sub> k <sub>IC</sub> <sup>m</sup>   | 1.82×10 <sup>12</sup> | 2.25×10 <sup>12</sup> | 2.04×10 <sup>12</sup> | 4.70×10 <sup>12</sup> | 1.76×10 <sup>12</sup> |
| T <sub>3</sub> →T <sub>2</sub> k <sub>IC</sub> <sup>n</sup>   | 2.32×10 <sup>12</sup> | 4.04×10 <sup>11</sup> | 5.18×10 <sup>11</sup> | 2.99×10 <sup>9</sup>  | 4.17×10 <sup>11</sup> |

<sup>a</sup> Nonradiative decay rate constants for the S<sub>1</sub>→S<sub>0</sub> transition; <sup>b</sup> Radiative decay rate constants for the S<sub>1</sub>→S<sub>0</sub> transition; <sup>c</sup> Intersystem crossing rate constants for the S<sub>1</sub>→T<sub>1</sub> transition; <sup>d</sup> Intersystem crossing rate constants for the S<sub>1</sub>→T<sub>2</sub> transition; <sup>e</sup> Intersystem crossing rate constants for the S<sub>1</sub>→T<sub>3</sub> transition; <sup>f</sup> Nonradiative decay rate constants for the T<sub>1</sub>→S<sub>0</sub> transition; <sup>g</sup> Nonradiative decay rate constants for the T<sub>2</sub>→S<sub>0</sub> transition; <sup>h</sup> Nonradiative decay rate constants for the T<sub>3</sub>→S<sub>0</sub> transition; <sup>i</sup> Radiative decay rate constants for the T<sub>1</sub>→S<sub>0</sub> transition; <sup>j</sup> Radiative decay rate constants for the T<sub>2</sub>→S<sub>0</sub> transition; <sup>k</sup> Radiative decay rate constants for the T<sub>3</sub>→S<sub>0</sub> transition; <sup>l</sup> Nonradiative decay rate constants for the T<sub>2</sub>→T<sub>1</sub> transition; <sup>m</sup> Nonradiative decay rate constants for the T<sub>3</sub>→T<sub>1</sub> transition; <sup>n</sup> Nonradiative decay rate constants for the T<sub>3</sub>→T<sub>2</sub> transition;

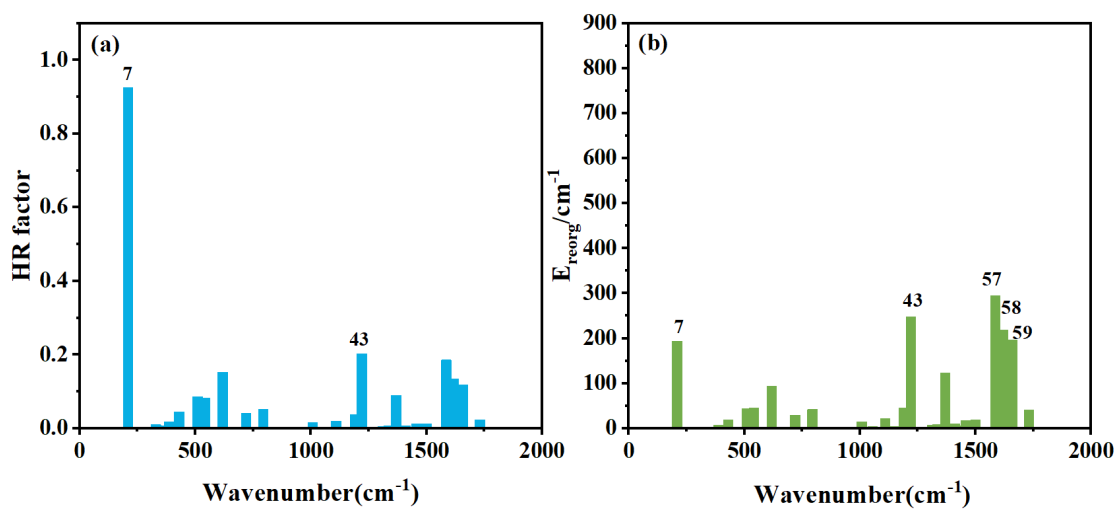

**Fig. S10.** Projection of HR (a) and  $E_{\text{reorg}}$  (b) of  $S_1 \rightarrow S_0$  transition to  $S_0$  vibrational normal modes of FL.

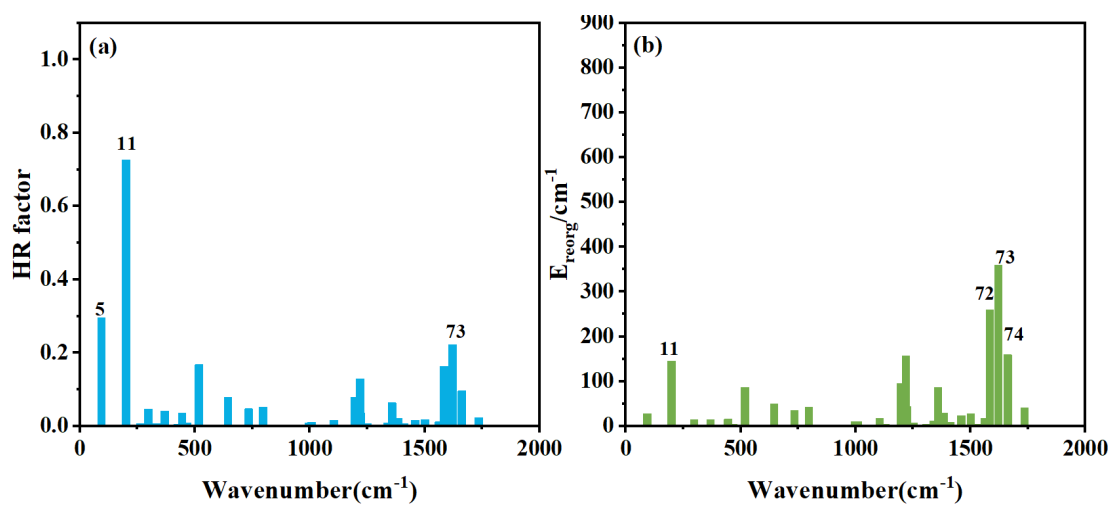

**Fig. S11.** Projection of HR (a) and  $E_{\text{reorg}}$  (b) of  $S_1 \rightarrow S_0$  transition to  $S_0$  vibrational normal modes of 7McFL.

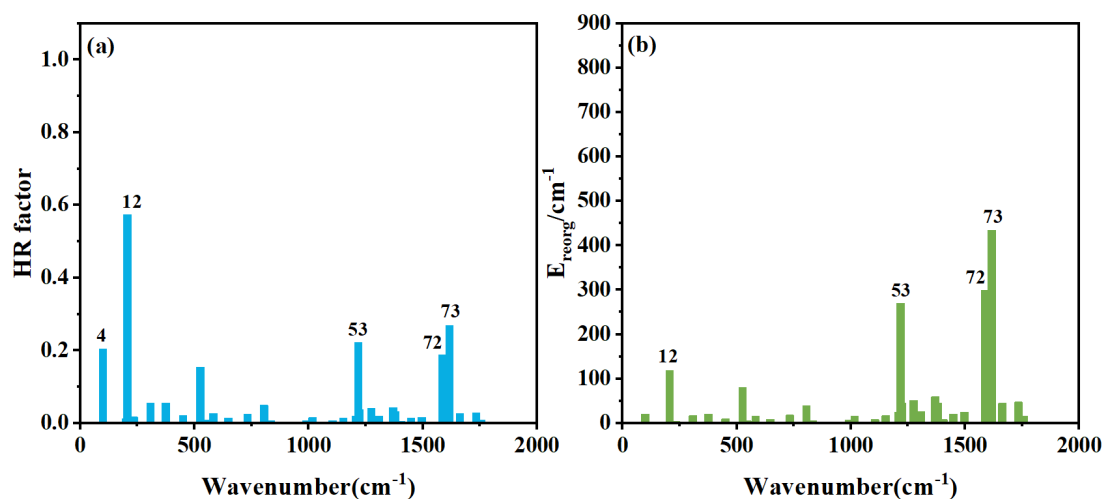

**Fig. S12.** Projection of HR (a) and  $E_{\text{reorg}}$  (b) of  $S_1 \rightarrow S_0$  transition to  $S_0$  vibrational normal modes of 8McFL

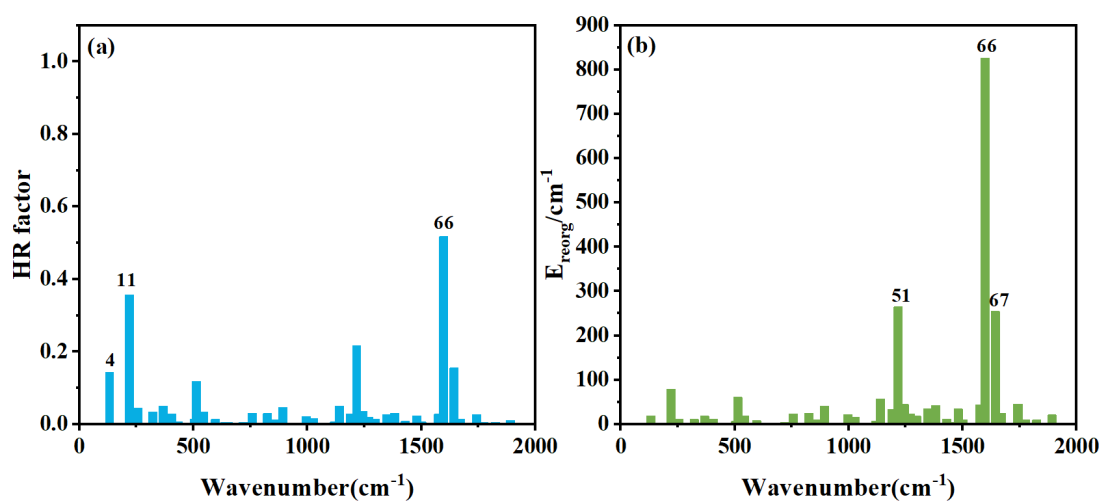

**Fig. S13.** Projection of HR (a) and  $E_{\text{reorg}}$  (b) of  $S_1 \rightarrow S_0$  transition to  $S_0$  vibrational normal modes of DcFL

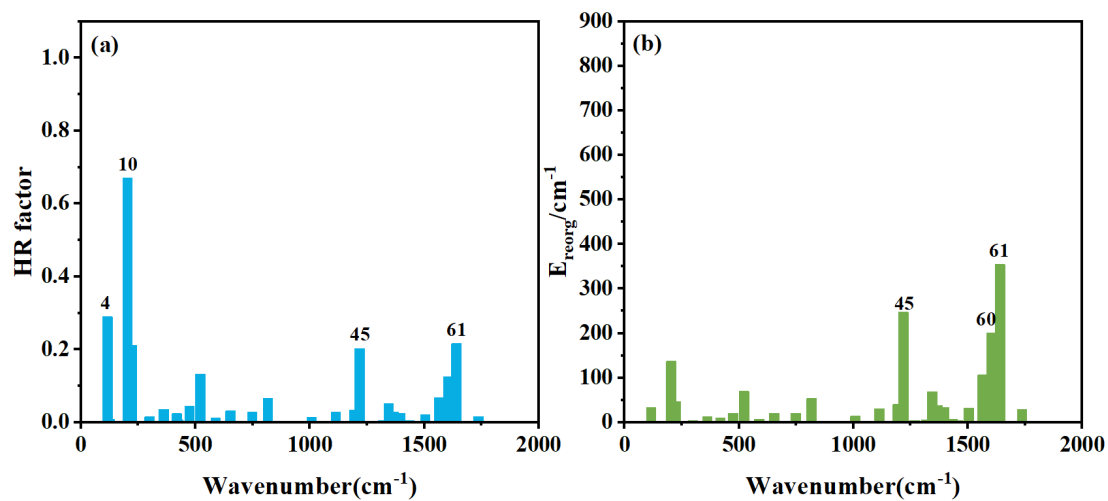

**Fig. S14.** Projection of HR (a) and  $E_{\text{reorg}}$  (b) of  $S_1 \rightarrow S_0$  transition to  $S_0$  vibrational normal modes of DBFL

**Table S9.** Projection of HR and  $E_{\text{reorg}}$  of  $S_1 \rightarrow S_0$  transition to  $S_0$  vibrational normal modes of FL.

| $S_0$<br>Normal<br>Mode | Frequency / $\text{cm}^{-1}$ | HR factor | HR %  | $E_{\text{reorg}} / \text{cm}^{-1}$ | $E_{\text{reorg}} \%$ |
|-------------------------|------------------------------|-----------|-------|-------------------------------------|-----------------------|
| 7                       | 209.08                       | 0.93      | 40.09 | 193.43                              | 10.83                 |
| 13                      | 430.16                       | 0.05      | 2.16  | 19.42                               | 1.09                  |
| 15                      | 510.76                       | 0.08      | 3.45  | 43.60                               | 2.44                  |
| 17                      | 540.82                       | 0.08      | 3.45  | 44.76                               | 2.51                  |
| 20                      | 618.67                       | 0.15      | 6.47  | 94.17                               | 5.27                  |
| 23                      | 719.32                       | 0.04      | 1.72  | 29.26                               | 1.64                  |
| 28                      | 794.58                       | 0.05      | 2.16  | 41.71                               | 2.34                  |
| 41                      | 1190.41                      | 0.04      | 1.72  | 45.15                               | 2.53                  |
| 43                      | 1220.89                      | 0.20      | 8.60  | 247.88                              | 13.88                 |
| 47                      | 1368.50                      | 0.09      | 3.88  | 122.95                              | 6.88                  |
| 53                      | 1499.71                      | 0.01      | 0.43  | 18.69                               | 1.05                  |
| 57                      | 1585.23                      | 0.19      | 8.19  | 294.43                              | 16.49                 |
| 58                      | 1618.34                      | 0.13      | 5.60  | 218.43                              | 12.23                 |
| 59                      | 1657.81                      | 0.12      | 5.17  | 196.60                              | 11.01                 |
| 60                      | 1731.35                      | 0.02      | 0.86  | 40.88                               | 2.29                  |

Note: Total  $E_{\text{reorg}}$  is  $1786 \text{ cm}^{-1}$  and total HR is 2.32.

**Table S10.** Projection of HR and  $E_{\text{reorg}}$  of  $S_1 \rightarrow S_0$  transition to  $S_0$  vibrational normal modes of 7McFL.

| $S_0$<br>Normal<br>Mode | Frequency / $\text{cm}^{-1}$ | HR factor | HR %  | $E_{\text{reorg}} / \text{cm}^{-1}$ | $E_{\text{reorg}} \%$ |
|-------------------------|------------------------------|-----------|-------|-------------------------------------|-----------------------|
| 5                       | 93.77                        | 0.30      | 12.05 | 27.67                               | 1.50                  |
| 11                      | 199.90                       | 0.73      | 29.32 | 145.21                              | 7.89                  |
| 24                      | 518.15                       | 0.17      | 6.83  | 86.90                               | 4.72                  |
| 28                      | 644.79                       | 0.08      | 3.21  | 49.97                               | 2.72                  |
| 32                      | 733.98                       | 0.05      | 2.01  | 34.48                               | 1.87                  |
| 36                      | 796.35                       | 0.05      | 2.01  | 41.65                               | 2.26                  |
| 52                      | 1196.55                      | 0.08      | 3.21  | 94.66                               | 5.14                  |
| 53                      | 1218.64                      | 0.13      | 5.22  | 156.75                              | 8.52                  |
| 54                      | 1222.37                      | 0.04      | 1.61  | 44.25                               | 2.40                  |
| 59                      | 1358.15                      | 0.06      | 2.41  | 86.02                               | 4.68                  |
| 67                      | 1501.79                      | 0.02      | 0.80  | 27.23                               | 1.48                  |
| 70                      | 1529.32                      | 0.01      | 0.40  | 4.59                                | 0.25                  |
| 71                      | 1560.95                      | 0.01      | 0.40  | 17.73                               | 0.96                  |
| 73                      | 1620.76                      | 0.22      | 8.84  | 359.77                              | 19.55                 |
| 74                      | 1662.04                      | 0.10      | 4.02  | 159.02                              | 8.64                  |

Note: Total  $E_{\text{reorg}}$  is  $1840 \text{ cm}^{-1}$  and total HR is 2.49.

**Table S11.** Projection of HR and  $E_{\text{reorg}}$  of  $S_1 \rightarrow S_0$  transition to  $S_0$  vibrational normal modes of 8McFL.

| $S_0$<br>Normal<br>Mode | Frequency / $\text{cm}^{-1}$ | HR factor | HR %  | $E_{\text{reorg}} / \text{cm}^{-1}$ | $E_{\text{reorg}} \%$ |
|-------------------------|------------------------------|-----------|-------|-------------------------------------|-----------------------|
| 4                       | 99.17                        | 0.20      | 8.81  | 20.23                               | 1.09                  |
| 12                      | 206.00                       | 0.57      | 25.11 | 118.38                              | 6.40                  |
| 18                      | 375.49                       | 0.06      | 2.64  | 20.86                               | 1.13                  |
| 24                      | 525.26                       | 0.15      | 6.61  | 81.06                               | 4.38                  |
| 36                      | 804.82                       | 0.05      | 2.20  | 39.56                               | 2.14                  |
| 45                      | 1016.97                      | 0.02      | 0.88  | 15.69                               | 0.85                  |
| 53                      | 1217.97                      | 0.22      | 9.69  | 269.96                              | 14.60                 |
| 54                      | 1223.39                      | 0.04      | 1.76  | 45.77                               | 2.48                  |
| 55                      | 1275.05                      | 0.04      | 1.76  | 51.01                               | 2.76                  |
| 59                      | 1369.37                      | 0.04      | 1.76  | 59.27                               | 3.21                  |
| 60                      | 1380.60                      | 0.03      | 1.32  | 45.07                               | 2.44                  |
| 72                      | 1587.23                      | 0.19      | 8.37  | 298.70                              | 16.15                 |
| 73                      | 1617.43                      | 0.27      | 11.89 | 434.22                              | 23.48                 |
| 74                      | 1662.78                      | 0.03      | 1.32  | 44.93                               | 2.43                  |
| 75                      | 1734.44                      | 0.03      | 1.32  | 47.47                               | 2.57                  |

Note: Total  $E_{\text{reorg}}$  is  $1849 \text{ cm}^{-1}$  and total HR is 2.27.

**Table S12.** Projection of HR and  $E_{\text{reorg}}$  of  $S_1 \rightarrow S_0$  transition to  $S_0$  vibrational normal modes of DcFL.

| $S_0$<br>Normal<br>Mode | Frequency / $\text{cm}^{-1}$ | HR factor | HR %  | $E_{\text{reorg}} / \text{cm}^{-1}$ | $E_{\text{reorg}} \%$ |
|-------------------------|------------------------------|-----------|-------|-------------------------------------|-----------------------|
| 4                       | 132.56                       | 0.14      | 6.22  | 19.05                               | 0.86                  |
| 11                      | 220.22                       | 0.36      | 16.00 | 78.52                               | 3.53                  |
| 12                      | 255.65                       | 0.04      | 1.78  | 11.42                               | 0.51                  |
| 16                      | 367.89                       | 0.05      | 2.22  | 18.41                               | 0.83                  |
| 21                      | 513.66                       | 0.12      | 5.33  | 61.02                               | 2.74                  |
| 23                      | 543.84                       | 0.03      | 1.33  | 18.55                               | 0.83                  |
| 33                      | 757.87                       | 0.03      | 1.33  | 23.06                               | 1.04                  |
| 41                      | 892.56                       | 0.05      | 2.22  | 40.86                               | 1.84                  |
| 48                      | 1139.55                      | 0.05      | 2.22  | 57.51                               | 2.58                  |
| 50                      | 1189.87                      | 0.03      | 1.33  | 33.58                               | 1.51                  |
| 51                      | 1216.44                      | 0.22      | 9.78  | 264.69                              | 11.89                 |
| 52                      | 1243.24                      | 0.04      | 1.78  | 44.84                               | 2.01                  |
| 66                      | 1597.64                      | 0.52      | 23.11 | 826.07                              | 37.11                 |
| 67                      | 1642.79                      | 0.16      | 7.11  | 254.86                              | 11.45                 |
| 69                      | 1742.33                      | 0.03      | 1.33  | 45.55                               | 2.05                  |

Note: Total  $E_{\text{reorg}}$  is  $2226 \text{ cm}^{-1}$  and total HR is 2.25.

**Table S13.** Projection of HR and  $E_{\text{reorg}}$  of  $S_1 \rightarrow S_0$  transition to  $S_0$  vibrational normal modes of DBFL.

| $S_0$<br>Normal<br>Mode | Frequency / $\text{cm}^{-1}$ | HR factor | HR %  | $E_{\text{reorg}} / \text{cm}^{-1}$ | $E_{\text{reorg}} \%$ |
|-------------------------|------------------------------|-----------|-------|-------------------------------------|-----------------------|
| 4                       | 115.99                       | 0.29      | 11.93 | 33.64                               | 2.01                  |
| 10                      | 204.22                       | 0.67      | 27.57 | 137.01                              | 8.19                  |
| 11                      | 223.55                       | 0.21      | 8.64  | 47.13                               | 2.82                  |
| 20                      | 474.27                       | 0.04      | 1.65  | 20.70                               | 1.24                  |
| 22                      | 522.37                       | 0.13      | 5.35  | 69.58                               | 4.16                  |
| 26                      | 653.79                       | 0.03      | 1.23  | 20.57                               | 1.23                  |
| 30                      | 747.81                       | 0.03      | 1.23  | 20.80                               | 1.24                  |
| 41                      | 1113.9                       | 0.03      | 1.23  | 31.04                               | 1.86                  |
| 44                      | 1194.17                      | 0.03      | 1.23  | 40.72                               | 2.43                  |
| 45                      | 1217.8                       | 0.20      | 8.23  | 247.00                              | 14.76                 |
| 49                      | 1344.61                      | 0.05      | 2.06  | 68.71                               | 4.11                  |
| 50                      | 1366.52                      | 0.03      | 1.23  | 37.92                               | 2.27                  |
| 59                      | 1564.84                      | 0.07      | 2.88  | 106.14                              | 6.34                  |
| 60                      | 1604.42                      | 0.13      | 5.35  | 201.36                              | 12.04                 |
| 61                      | 1640.31                      | 0.22      | 9.05  | 354.26                              | 21.18                 |

Note: Total  $E_{\text{reorg}}$  is  $1673 \text{ cm}^{-1}$  and total HR is 2.43.

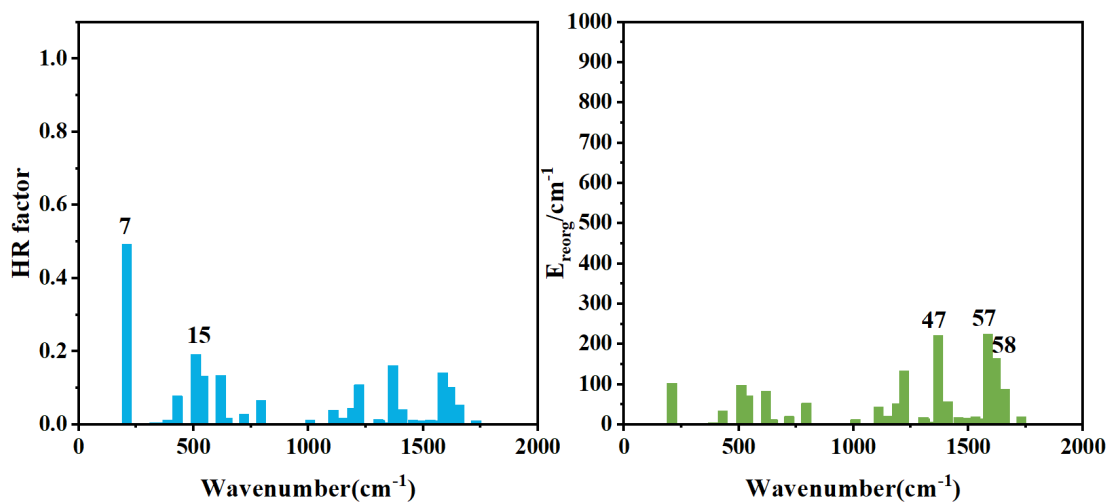

**Fig. S15.** Projection of HR (a) and  $E_{\text{reorg}}$  (b) of  $T_1 \rightarrow S_0$  transition to  $S_0$  vibrational normal modes of FL.

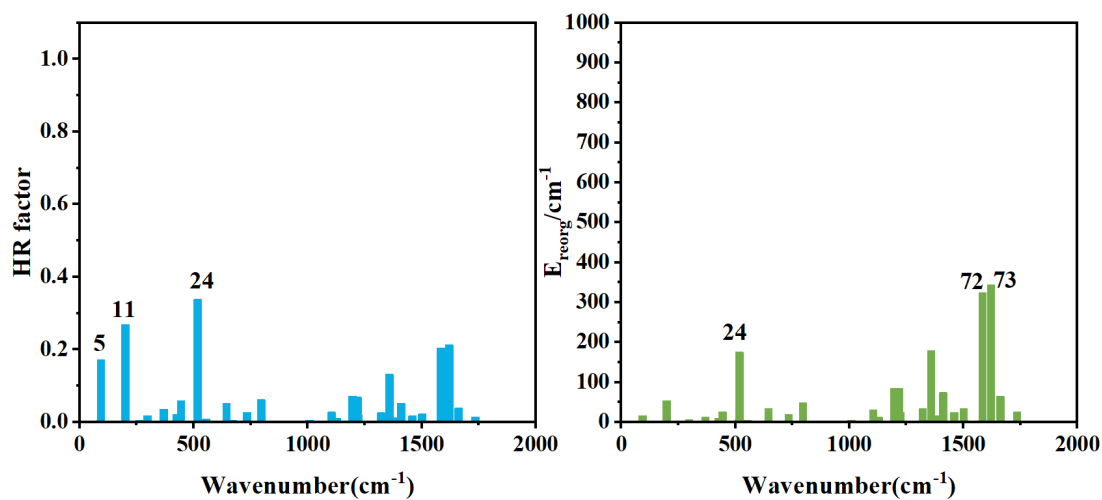

**Fig. S16.** Projection of HR (a) and  $E_{\text{reorg}}$  (b) of  $T_1 \rightarrow S_0$  transition to  $S_0$  vibrational normal modes of 7McFL.

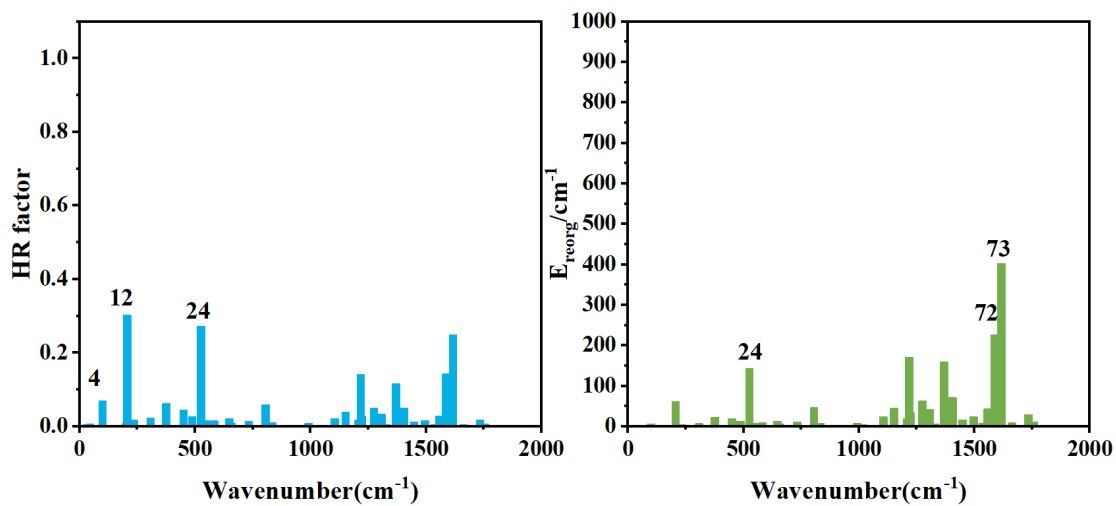

**Fig. S17.** Projection of HR (a) and  $E_{\text{reorg}}$  (b) of  $T_1 \rightarrow S_0$  transition to  $S_0$  vibrational normal modes of 8McFL.

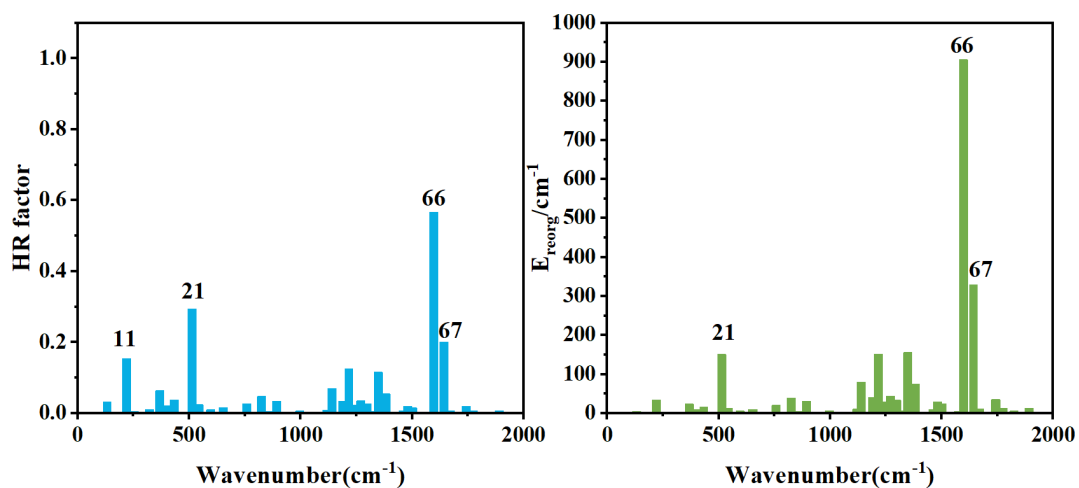

**Fig. S18.** Projection of HR (a) and  $E_{\text{reorg}}$  (b) of  $T_1 \rightarrow S_0$  transition to  $S_0$  vibrational normal modes of DcFL.

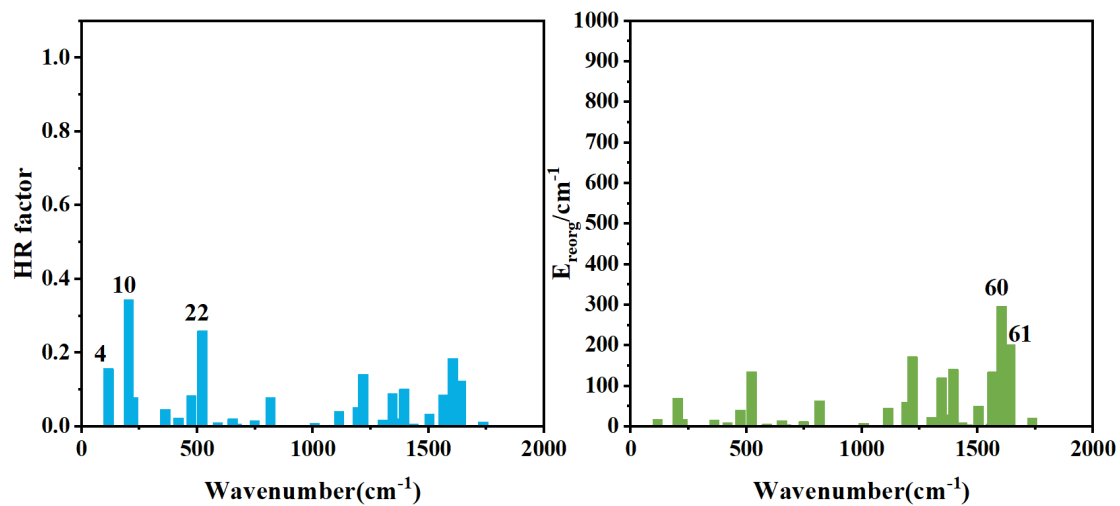

**Fig. S19.** Projection of HR (a) and  $E_{\text{reorg}}$  (b) of  $T_1 \rightarrow S_0$  transition to  $S_0$  vibrational normal modes of DBFL.

**Table S14.** Projection of HR and  $E_{\text{reorg}}$  of  $T_1 \rightarrow S_0$  transition to  $S_0$  vibrational normal modes of FL.

| $S_0$ Normal Mode | Frequency / $\text{cm}^{-1}$ | HR factor | HR %  | $E_{\text{reorg}}$ / $\text{cm}^{-1}$ | $E_{\text{reorg}}$ % |
|-------------------|------------------------------|-----------|-------|---------------------------------------|----------------------|
| 7                 | 209.08                       | 0.49      | 24.38 | 102.99                                | 6.13                 |
| 13                | 430.16                       | 0.08      | 3.98  | 33.68                                 | 2.00                 |
| 15                | 510.76                       | 0.19      | 9.45  | 97.91                                 | 5.83                 |
| 17                | 540.82                       | 0.13      | 6.47  | 71.60                                 | 4.26                 |
| 20                | 618.67                       | 0.14      | 6.97  | 83.33                                 | 4.96                 |
| 23                | 719.32                       | 0.03      | 1.49  | 20.18                                 | 1.20                 |
| 28                | 794.58                       | 0.07      | 3.48  | 52.86                                 | 3.15                 |
| 38                | 1108.81                      | 0.04      | 1.99  | 44.03                                 | 2.62                 |
| 41                | 1190.41                      | 0.04      | 1.99  | 52.34                                 | 3.12                 |
| 43                | 1220.89                      | 0.11      | 5.47  | 132.80                                | 7.90                 |
| 47                | 1368.50                      | 0.16      | 7.96  | 220.91                                | 13.15                |
| 49                | 1410.43                      | 0.04      | 1.99  | 56.47                                 | 3.36                 |
| 57                | 1585.23                      | 0.14      | 6.97  | 224.91                                | 13.39                |
| 58                | 1618.34                      | 0.10      | 4.98  | 164.24                                | 9.78                 |
| 59                | 618.67                       | 0.14      | 6.97  | 83.33                                 | 4.96                 |

Note: Total  $E_{\text{reorg}}$  is  $1680 \text{ cm}^{-1}$  and total HR is 2.01.

**Table S15.** Projection of HR and  $E_{\text{reorg}}$  of  $T_1 \rightarrow S_0$  transition to  $S_0$  vibrational normal modes of 7McFL.

| $S_0$ Normal Mode | Frequency / $\text{cm}^{-1}$ | HR factor | HR %  | $E_{\text{reorg}}$ / $\text{cm}^{-1}$ | $E_{\text{reorg}}$ % |
|-------------------|------------------------------|-----------|-------|---------------------------------------|----------------------|
| 5                 | 93.77                        | 0.17      | 8.25  | 16.08                                 | 0.89                 |
| 11                | 199.90                       | 0.27      | 13.11 | 53.80                                 | 2.97                 |
| 18                | 369.16                       | 0.04      | 1.94  | 13.20                                 | 0.73                 |
| 21                | 444.22                       | 0.06      | 2.91  | 26.15                                 | 1.44                 |
| 24                | 518.15                       | 0.34      | 16.50 | 175.29                                | 9.69                 |
| 28                | 644.79                       | 0.05      | 2.43  | 33.44                                 | 1.85                 |
| 36                | 796.35                       | 0.06      | 2.91  | 49.32                                 | 2.73                 |
| 52                | 1196.55                      | 0.07      | 3.40  | 85.02                                 | 4.70                 |
| 53                | 1218.64                      | 0.07      | 3.40  | 84.18                                 | 4.65                 |
| 59                | 1358.15                      | 0.13      | 6.31  | 179.00                                | 9.89                 |
| 61                | 1411.31                      | 0.05      | 2.43  | 73.75                                 | 4.08                 |
| 67                | 1501.79                      | 0.02      | 0.97  | 33.88                                 | 1.87                 |
| 72                | 1584.16                      | 0.20      | 9.71  | 323.22                                | 17.87                |
| 73                | 1620.76                      | 0.21      | 10.19 | 343.96                                | 19.01                |
| 74                | 1662.04                      | 0.04      | 1.94  | 64.77                                 | 3.58                 |

Note: Total  $E_{\text{reorg}}$  is  $1809 \text{ cm}^{-1}$  and total HR is 2.06.

**Table S16.** Projection of HR and  $E_{\text{reorg}}$  of  $T_1 \rightarrow S_0$  transition to  $S_0$  vibrational normal modes of 8McFL.

| $S_0$ Normal Mode | Frequency / $\text{cm}^{-1}$ | HR factor | HR %  | $E_{\text{reorg}}$ / $\text{cm}^{-1}$ | $E_{\text{reorg}}$ % |
|-------------------|------------------------------|-----------|-------|---------------------------------------|----------------------|
| 4                 | 99.17                        | 0.07      | 3.45  | 6.82                                  | 0.36                 |
| 12                | 206.00                       | 0.30      | 14.78 | 62.29                                 | 3.32                 |
| 18                | 375.49                       | 0.06      | 2.96  | 23.17                                 | 1.24                 |
| 21                | 450.82                       | 0.04      | 1.97  | 20.00                                 | 1.07                 |
| 24                | 525.26                       | 0.27      | 13.30 | 142.97                                | 7.63                 |
| 36                | 804.82                       | 0.06      | 2.96  | 47.35                                 | 2.53                 |
| 49                | 1152.53                      | 0.04      | 1.97  | 45.00                                 | 2.40                 |
| 53                | 1217.97                      | 0.14      | 6.90  | 171.07                                | 9.12                 |
| 54                | 1223.39                      | 0.03      | 1.48  | 33.75                                 | 1.80                 |
| 59                | 1369.37                      | 0.12      | 5.91  | 158.68                                | 8.46                 |
| 60                | 1380.60                      | 0.03      | 1.48  | 35.40                                 | 1.89                 |
| 61                | 1405.05                      | 0.05      | 2.46  | 71.20                                 | 3.80                 |
| 71                | 1557.53                      | 0.03      | 1.48  | 43.21                                 | 2.30                 |
| 72                | 1587.23                      | 0.14      | 6.90  | 226.00                                | 12.05                |
| 73                | 1617.43                      | 0.25      | 12.32 | 402.35                                | 21.46                |

Note: Total  $E_{\text{reorg}}$  is  $1875 \text{ cm}^{-1}$  and total HR is 2.03.

**Table S17.** Projection of HR and  $E_{\text{reorg}}$  of  $T_1 \rightarrow S_0$  transition to  $S_0$  vibrational normal modes of DcFL.

| $S_0$ Normal Mode | Frequency / $\text{cm}^{-1}$ | HR factor | HR %  | $E_{\text{reorg}}$ / $\text{cm}^{-1}$ | $E_{\text{reorg}}$ % |
|-------------------|------------------------------|-----------|-------|---------------------------------------|----------------------|
| 4                 | 132.56                       | 0.03      | 1.40  | 4.25                                  | 0.18                 |
| 11                | 220.22                       | 0.15      | 6.98  | 33.90                                 | 1.42                 |
| 16                | 367.89                       | 0.06      | 2.79  | 23.27                                 | 0.97                 |
| 21                | 513.66                       | 0.29      | 13.49 | 150.90                                | 6.31                 |
| 38                | 824.96                       | 0.05      | 2.33  | 39.23                                 | 1.64                 |
| 41                | 892.56                       | 0.03      | 1.40  | 30.59                                 | 1.28                 |
| 48                | 1139.55                      | 0.07      | 3.26  | 80.05                                 | 3.35                 |
| 50                | 1189.87                      | 0.03      | 1.40  | 40.90                                 | 1.71                 |
| 51                | 1216.44                      | 0.13      | 6.05  | 152.17                                | 6.36                 |
| 52                | 1243.24                      | 0.02      | 0.93  | 29.18                                 | 1.22                 |
| 53                | 1269.80                      | 0.04      | 1.86  | 44.55                                 | 1.86                 |
| 56                | 1348.25                      | 0.12      | 5.58  | 155.69                                | 6.51                 |
| 57                | 1381.92                      | 0.05      | 2.33  | 75.41                                 | 3.15                 |
| 66                | 1597.64                      | 0.57      | 26.51 | 905.68                                | 37.88                |
| 67                | 1642.79                      | 0.20      | 9.30  | 329.42                                | 13.78                |

Note: Total  $E_{\text{reorg}}$  is  $2391 \text{ cm}^{-1}$  and total HR is 2.15.

**Table S18.** Projection of HR and  $E_{\text{reorg}}$  of  $T_1 \rightarrow S_0$  transition to  $S_0$  vibrational normal modes of DBFL.

| $S_0$ Normal Mode | Frequency / $\text{cm}^{-1}$ | HR factor | HR %  | $E_{\text{reorg}}$ / $\text{cm}^{-1}$ | $E_{\text{reorg}}$ % |
|-------------------|------------------------------|-----------|-------|---------------------------------------|----------------------|
| 4                 | 115.99                       | 0.16      | 7.77  | 18.22                                 | 1.05                 |
| 10                | 204.22                       | 0.34      | 16.50 | 70.41                                 | 4.04                 |
| 15                | 361.60                       | 0.05      | 2.43  | 16.74                                 | 0.96                 |
| 20                | 474.27                       | 0.08      | 3.88  | 39.90                                 | 2.29                 |
| 22                | 522.37                       | 0.26      | 12.62 | 135.39                                | 7.77                 |
| 33                | 817.19                       | 0.08      | 3.88  | 63.40                                 | 3.64                 |
| 41                | 1113.90                      | 0.04      | 1.94  | 46.22                                 | 2.65                 |
| 44                | 1194.17                      | 0.05      | 2.43  | 60.79                                 | 3.49                 |
| 45                | 1217.80                      | 0.14      | 6.80  | 172.05                                | 9.88                 |
| 49                | 1344.61                      | 0.09      | 4.37  | 119.69                                | 6.87                 |
| 51                | 1395.11                      | 0.10      | 4.85  | 141.25                                | 8.11                 |
| 56                | 1504.30                      | 0.03      | 1.46  | 50.02                                 | 2.87                 |
| 59                | 1564.84                      | 0.09      | 4.37  | 135.05                                | 7.75                 |
| 60                | 1604.42                      | 0.19      | 9.22  | 297.03                                | 17.05                |
| 61                | 1640.31                      | 0.12      | 5.83  | 202.38                                | 11.62                |

Note: Total  $E_{\text{reorg}}$  is  $1742 \text{ cm}^{-1}$  and total HR is 2.06.

**Table S19.** Calculated rates for evolution of excited McFLs in mol·L<sup>-1</sup>·s<sup>-1</sup>.

| 298 K                                                         | FL                     | 7McFL                  | 8McFL                  | DcFL                   | DBFL                   |
|---------------------------------------------------------------|------------------------|------------------------|------------------------|------------------------|------------------------|
| S <sub>1</sub> →S <sub>0</sub> R <sub>IC</sub> <sup>a</sup>   | 2.24                   | 1.56                   | 5.97×10 <sup>-1</sup>  | 3.56×10 <sup>1</sup>   | 1.50×10 <sup>-2</sup>  |
| S <sub>1</sub> →S <sub>0</sub> R <sub>F</sub> <sup>b</sup>    | 5.82×10 <sup>-1</sup>  | 2.21×10 <sup>-1</sup>  | 9.09×10 <sup>-2</sup>  | 2.79×10 <sup>-1</sup>  | 1.03×10 <sup>-2</sup>  |
| S <sub>1</sub> →T <sub>1</sub> R <sub>ISC</sub> <sup>c</sup>  | 2.76×10 <sup>-7</sup>  | 2.08×10 <sup>-7</sup>  | 1.79×10 <sup>-7</sup>  | 1.72×10 <sup>-8</sup>  | 3.84×10 <sup>-7</sup>  |
| S <sub>1</sub> →T <sub>2</sub> R <sub>ISC</sub> <sup>d</sup>  | 4.23×10 <sup>-2</sup>  | 1.22×10 <sup>-2</sup>  | 6.72×10 <sup>-3</sup>  | 4.09×10 <sup>1</sup>   | 9.16×10 <sup>-5</sup>  |
| S <sub>1</sub> →T <sub>3</sub> R <sub>ISC</sub> <sup>e</sup>  | 8.18                   | 1.49×10 <sup>1</sup>   | 3.12                   | 2.91×10 <sup>-2</sup>  | 2.21                   |
| T <sub>1</sub> →S <sub>0</sub> R' <sub>ISC</sub> <sup>f</sup> | 7.75                   | 1.47×10 <sup>1</sup>   | 3.12×10 <sup>1</sup>   | 4.10×10 <sup>2</sup>   | 1.27×10 <sup>-2</sup>  |
| T <sub>2</sub> →S <sub>0</sub> R' <sub>ISC</sub> <sup>g</sup> | 2.46×10 <sup>-9</sup>  | 1.51×10 <sup>-9</sup>  | 5.29×10 <sup>-9</sup>  | 4.43×10 <sup>-8</sup>  | 1.30×10 <sup>-13</sup> |
| T <sub>3</sub> →S <sub>0</sub> R' <sub>ISC</sub> <sup>h</sup> | 1.81×10 <sup>-5</sup>  | 2.24×10 <sup>-7</sup>  | 1.74×10 <sup>-6</sup>  | 6.24×10 <sup>-12</sup> | 2.49×10 <sup>-13</sup> |
| T <sub>1</sub> →S <sub>0</sub> R <sub>P</sub> <sup>i</sup>    | 8.35×10 <sup>-4</sup>  | 1.52×10 <sup>-3</sup>  | 4.99×10 <sup>-4</sup>  | 1.88×10 <sup>-2</sup>  | 5.49×10 <sup>-4</sup>  |
| T <sub>2</sub> →S <sub>0</sub> R <sub>P</sub> <sup>j</sup>    | 2.20×10 <sup>-14</sup> | 4.26×10 <sup>-14</sup> | 4.94×10 <sup>-14</sup> | 4.30×10 <sup>-12</sup> | 8.52×10 <sup>-16</sup> |
| T <sub>3</sub> →S <sub>0</sub> R <sub>P</sub> <sup>k</sup>    | 4.58×10 <sup>-12</sup> | 2.12×10 <sup>-12</sup> | 2.21×10 <sup>-12</sup> | 7.14×10 <sup>-16</sup> | 2.49×10 <sup>-13</sup> |
| T <sub>2</sub> →T <sub>1</sub> R <sub>IC</sub> <sup>l</sup>   | 2.19                   | 2.13                   | 6.32                   | 4.09×10 <sup>1</sup>   | 3.36×10 <sup>-1</sup>  |
| T <sub>3</sub> →T <sub>1</sub> R <sub>IC</sub> <sup>m</sup>   | 6.03                   | 1.27×10 <sup>1</sup>   | 2.50×10 <sup>1</sup>   | 2.26×10 <sup>-2</sup>  | 1.26                   |
| T <sub>3</sub> →T <sub>2</sub> R <sub>IC</sub> <sup>n</sup>   | 2.15                   | 2.12                   | 6.25                   | 4.74×10 <sup>-3</sup>  | 3.36×10 <sup>-1</sup>  |
| T <sub>1</sub> →S <sub>1</sub> R <sub>RISC</sub> <sup>o</sup> | 4.57×10 <sup>-1</sup>  | 8.17×10 <sup>-2</sup>  | 4.00×10 <sup>-1</sup>  | 9.34×10 <sup>-2</sup>  | 1.58                   |
| T <sub>2</sub> →S <sub>1</sub> R <sub>RISC</sub> <sup>p</sup> | 3.41×10 <sup>-10</sup> | 7.10×10 <sup>-12</sup> | 2.63×10 <sup>-11</sup> | 9.29×10 <sup>-6</sup>  | 7.34×10 <sup>-13</sup> |
| T <sub>3</sub> →S <sub>1</sub> R <sub>RISC</sub> <sup>q</sup> | 1.09×10 <sup>-4</sup>  | 4.14×10 <sup>-6</sup>  | 2.54×10 <sup>-4</sup>  | 9.04×10 <sup>-11</sup> | 1.02×10 <sup>-3</sup>  |

<sup>a</sup> S<sub>1</sub>→S<sub>0</sub> IC rate; <sup>b</sup> S<sub>1</sub>→S<sub>0</sub> FE rate; <sup>c</sup> S<sub>1</sub>→T<sub>1</sub> ISC rate; <sup>d</sup> S<sub>1</sub>→T<sub>2</sub> ISC rate; <sup>e</sup> S<sub>1</sub>→T<sub>3</sub> ISC rate; <sup>f</sup> Nonradiative decay rate for the T<sub>1</sub>→S<sub>0</sub> transition; <sup>g</sup> Nonradiative decay rate for the T<sub>2</sub>→S<sub>0</sub> transition; <sup>h</sup> Nonradiative decay rate for the T<sub>3</sub>→S<sub>0</sub> transition; <sup>i</sup> T<sub>1</sub>→S<sub>0</sub> PE rate; <sup>j</sup> T<sub>2</sub>→S<sub>0</sub> PE rate; <sup>k</sup> T<sub>3</sub>→S<sub>0</sub> PE rate; <sup>l</sup> T<sub>2</sub>→T<sub>1</sub> IC rate; <sup>m</sup> T<sub>3</sub>→T<sub>1</sub> IC rate; <sup>n</sup> T<sub>3</sub>→T<sub>2</sub> IC rate; <sup>o</sup> T<sub>1</sub>→S<sub>1</sub> reverse ISC rate; <sup>p</sup> T<sub>2</sub>→S<sub>1</sub> reverse ISC rate; <sup>q</sup> T<sub>3</sub>→S<sub>1</sub> reverse ISC rate.

## REFERENCES:

1. R. C. Binning and L. A. Curtiss, *J. Comput. Chem.*, 1990, **11**, 1206-1216.
2. M. M. Francl, W. J. Pietro, W. J. Hehre, J. S. Binkley, M. S. Gordon, D. J. Defrees and J. A. Pople, *J. Chem. Phys.*, 1982, **77**, 3654-3665.
3. A. D. Becke, *J. Chem. Phys.*, 1993, **98**, 5648-5652.
4. C. T. Lee, W. T. Yang and R. G. Parr, *Phys. Rev. B*, 1988, **37**, 785-789.
5. S. Miertus, E. Scrocco and J. Tomasi, *Chem. Phys.*, 1981, **55**, 117-129.
6. R. Cammi and B. Mennucci, *J. Chem. Phys.*, 1999, **110**, 9877-9886.
7. J. Tomasi, B. Mennucci and R. Cammi, *Chem. Rev.*, 2005, **105**, 2999-3093.
8. M. J. Frisch, G. W. Trucks, H. B. Schlegel, G. E. Scuseria, M. A. Robb, J. R. Cheeseman, G. Scalmani, V. Barone, G. A. Petersson, H. Nakatsuji, X. Li, M. Caricato, A. V. Marenich, J. Bloino, B. G. Janesko, R. Gomperts, B. Mennucci, H. P. Hratchian, J. V. Ortiz, A. F. Izmaylov, J. L. Sonnenberg, Williams, F. Ding, F. Lipparini, F. Egidi, J. Goings, B. Peng, A. Petrone, T. Henderson, D. Ranasinghe, V. G. Zakrzewski, J. Gao, N. Rega, G. Zheng, W. Liang, M. Hada, M. Ehara, K. Toyota, R. Fukuda, J. Hasegawa, M. Ishida, T. Nakajima, Y. Honda, O. Kitao, H. Nakai, T. Vreven, K. Throssell, J. A. Montgomery Jr, J. E. Peralta, F. Ogliaro, M. J. Bearpark, J. J. Heyd, E. N. Brothers, K. N. Kudin, V. N. Staroverov, T. A. Keith, R. Kobayashi, J. Normand, K. Raghavachari, A. P. Rendell, J. C. Burant, S. S. Iyengar, J. Tomasi, M. Cossi, J. M. Millam, M. Klene, C. Adamo, R. Cammi, J. W. Ochterski, R. L. Martin, K. Morokuma, O. Farkas, J. B. Foresman and D. J. Fox, *Gaussian 16 A03*, 2016.
9. O. Vahtras, H. Agren, P. Jorgensen, H. J. A. Jensen, T. Helgaker and J. Olsen, *J. Chem. Phys.*, 1992, **97**, 9178-9187.
10. H. Hettema, H. J. A. Jensen, P. Jorgensen and J. Olsen, *J. Chem. Phys.*, 1992, **97**, 1174-1190.
11. H. Agren, O. Vahtras, H. Koch, P. Jorgensen and T. Helgaker, *J. Chem. Phys.*, 1993, **98**, 6417-6423.
12. J. Olsen, D. L. Yeager and P. Jorgensen, *J. Chem. Phys.*, 1989, **91**, 381-388.
13. P. Jorgensen, H. J. A. Jensen and J. Olsen, *J. Chem. Phys.*, 1988, **89**, 3654-3661.
14. K. Aidas, C. Angeli, K. L. Bak, V. Bakken, R. Bast, L. Boman, O. Christiansen, R. Cimraglia, S. Coriani, P. Dahle, E. K. Dalskov, U. Ekstrom, T. Enevoldsen, J. J. Eriksen, P. Ettenhuber, B. Fernandez, L. Ferrighi, H. Fliegl, L. Frediani, K. Hald, A. Halkier, C. Hattig, H. Heiberg, T. Helgaker, A. C. Hennum, H. Hettema, E. Hjertenaes, S. Host, I. M. Hoyvik, M. F. Iozzi, B. Jansik, H. J. A. Jensen, D. Jonsson, P. Jorgensen, J. Kauczor, S. Kirpekar, T. Kjrgaard, W. Klopper, S. Knecht, R. Kobayashi, H. Koch, J. Kongsted, A. Krapp, K. Kristensen, A. Ligabue, O. B. Lutnaes, J. I. Melo, K. V. Mikkelsen, R. H. Myhre, C. Neiss, C. B. Nielsen, P. Norman, J. Olsen, J. M. H. Olsen, A. Osted, M. J. Packer, F. Pawłowski, T. B. Pedersen, P. F. Provasi, S. Reine, Z. Rinkevicius, T. A. Ruden, K. Ruud, V. V. Rybkin, P. Salek, C. C. M. Samson, A. S. de Meras, T. Saue, S. P. A. Sauer, B. Schimmelpfennig, K. Snegov, A. H. Steindal, K. O. Sylvester-Hvid, P. R. Taylor, A. M. Teale, E. I. Tellgren, D. P. Tew, A. J. Thorvaldsen, L. Thogersen, O. Vahtras, M. A. Watson, D. J. D. Wilson, M. Ziolkowski and H. Agren, *Wiley Interdiscip. Rev.-Comput. Mol. Sci.*, 2014, **4**, 269-284.
15. Q. Peng, Y. P. Yi, Z. G. Shuai and J. S. Shao, *J. Chem. Phys.*, 2007, **126**, 114302.
16. Q. Peng, Y. P. Yi, Z. G. Shuai and J. S. Shao, *J. Am. Chem. Soc.*, 2007, **129**, 9333-9339.
17. Y. L. Niu, Q. A. Peng, C. M. Deng, X. Gao and Z. G. Shuai, *J. Phys. Chem. A*, 2010, **114**, 7817-7831.

18. Y. Niu, Q. Peng and Z. Shuai, *Sci. China Ser. B-Chem.*, 2008, **51**, 1153-1158.
19. Q. Peng, Y. L. Niu, Q. H. Shi, X. Gao and Z. G. Shuai, *J. Chem. Theory Comput.*, 2013, **9**, 1132-1143.
20. Hongzhiwei Technology, *Device Studio 2021A*, 2021, Available online: <https://iresearch.net.cn/cloudSoftware> (accessed on 2021-10-12).
21. Z. G. Shuai, *Chin. J. Chem.*, 2020, **38**, 1223-1232.
22. Y. L. Niu, W. Q. Li, Q. Peng, H. Geng, Y. P. Yi, L. J. Wang, G. J. Nan, D. Wang and Z. G. Shuai, *Mol. Phys.*, 2018, **116**, 1078-1090.
23. Z. G. Shuai and Q. Peng, *Phys. Rep.-Rev. Sec. Phys. Lett.*, 2014, **537**, 123-156.
24. Z. G. Shuai and Q. Peng, *Natl. Sci. Rev.*, 2017, **4**, 224-239.
25. Y. Niu, Q. Peng, C. Deng, X. Gao and Z. Shuai, *J. Phys. Chem. A*, 2010, **114**, 7817-7831.
